# Supplementary material
Source: publisher site journal article supplement (https://www.dovepress.com/article/424911)
Supplement: Supplementary file 1 [file get_supplementary_file.php]

Supplementary Material

Identification of Cell-cell Communications by Single-cell RNA Sequencing in End Stage Renal Disease Provides New Insights into Immune Cell Heterogeneity

Ruijing Zhang, Xinyan Liu, Yuehong Ma, Lijuan Cheng, Yi Ren, Rongshan Li*

*** Correspondence:** Rongshan Li, rongshanli@126.com

# Supplementary Data 1.1 Basic information of patients and healthy controls

| No | Gender | Age | eGFR | Length of Hemodialysis  (Months) | Frequency of  Hemodialysis  (times per week) | Primary Kidney Damage | Secondary Kidney Disease | Hypertension | Diabetes | Antoimmune Disease | Cancer |
| --- | --- | --- | --- | --- | --- | --- | --- | --- | --- | --- | --- |
| Patient 1 | Male | 65 | 6.76 | 61 | 3 | No | Diabetes Nephropathy | Yes | Yes | No | No |
| Patient 2 | Male | 56 | 6.16 | 70 | 3 | Yes | No | Yes | No | No | No |
| Patient 3 | Male | 57 | 8.44 | 76 | 3 | Yes | No | Yes | No | No | No |
| Patient 4 | Female | 41 | 9.59 | 68 | 3 | No | Diabetes Nephropathy | Yes | No | No | No |
| Patient 5 | Male | 58 | 6.36 | 63 | 3 | No | Diabetes Nephropathy | No | No | No | No |
| Patient 6 | Female | 57 | 7.05 | 80 | 3 | Yes | No | Yes | Yes | No | No |
| Patient 7 | Male | 73 | 6.96 | 83 | 3 | No | Diabetes Nephropathy | Yes | Yes | No | No |
| Patient 8 | Male | 62 | 6.9 | 72 | 3 | No | Diabetes Nephropathy | Yes | Yes | No | No |
| Patient 9 | Female | 44 | 6.86 | 66 | 3 | Yes | No | Yes | No | No | No |
| Patient 10 | Female | 55 | 7.33 | 68 | 3 | Yes | No | Yes | No | No | No |
| Patient 11 | Male | 73 | 7.26 | 81 | 3 | Yes | No | Yes | No | No | No |
| Patient 12 | Male | 64 | 7.15 | 79 | 3 | No | Diabetes Nephropathy | Yes | Yes | No | No |
| Patient 13 | Male | 58 | 8.62 | 90 | 3 | Yes | No | Yes | No | No | No |
| Patient 14 | Male | 68 | 9.01 | 76 | 3 | Yes | No | Yes | No | No | No |
| Patient 15 | Male | 67 | 7.17 | 67 | 3 | No | Diabetes Nephropathy | Yes | Yes | No | No |
| Patient 16 | Male | 38 | 7.92 | 69 | 3 | Yes | No | Yes | No | No | No |
| Patient 17 | Male | 46 | 7.26 | 60 | 3 | Yes | No | Yes | No | No | No |
| Patient 18 | Female | 51 | 6.9 | 64 | 3 | Yes | No | Yes | No | No | No |
| Patient 19 | Female | 50 | 7.96 | 91 | 3 | Yes | No | Yes | No | No | No |
| Patient 20 | Male | 63 | 7.31 | 83 | 3 | Yes | No | No | No | No | No |

| Healthy Control | |  |  |  |  |  |
| --- | --- | --- | --- | --- | --- | --- |
| No. | Gender |  | Age | Hypertension | Diabetes | Medication |
| No.1 | Male |  | 65 | No | No | Not reported |
| No.2 | Male |  | 58 | Yes | No | Not reported |
| No.3 | Male |  | 56 | No | No | Not reported |
| No.4 | Female |  | 43 | No | No | Not reported |
| No.5 | Male |  | 57 | Yes | No | Not reported |
| No.6 | Female |  | 57 | No | No | Not reported |
| No.7 | Male |  | 63 | No | No | Not reported |
| No.8 | Male |  | 62 | No | No | Not reported |
| No.9 | Female |  | 44 | No | No | Not reported |
| No.10 | Female |  | 55 | Yes | No | Not reported |
| No.11 | Male |  | 73 | No | No | Not reported |
| No.12 | Male |  | 64 | No | No | Not reported |
| No.13 | Male |  | 58 | No | No | Not reported |
| No.14 | Male |  | 68 | No | No | Not reported |
| No.15 | Male |  | 67 | No | No | Not reported |
| No.16 | Male |  | 38 | Yes | No | Not reported |
| No.17 | Male |  | 48 | No | No | Not reported |
| No.18 | Female |  | 50 | No | No | Not reported |
| No.19 | Female |  | 54 | Yes | No | Not reported |
| No.20 | Male |  | 61 | No | No | Not reported |

# Supplementary Data 1.2 Marker genes of five kinds of immune cells in PBMCs

| **Marker genes of five kinds of immune cells in PBMCs** | | | | | | |
| --- | --- | --- | --- | --- | --- | --- |
| p_value | avg_log2FC | pct.1 | pct.2 | p_value_adj | cluster | gene |
| 0 | 2.649452 | 0.856 | 0.431 | 0 | T cells | IL7R |
| 0 | 1.383099 | 0.84 | 0.592 | 0 | T cells | TRBC2 |
| 0 | 1.306411 | 0.544 | 0.352 | 0 | T cells | CD8B |
| 0 | 1.233751 | 0.677 | 0.451 | 0 | T cells | PRKCQ-AS1 |
| 0 | 1.110403 | 0.561 | 0.379 | 0 | T cells | MAL |
| 0 | 1.097741 | 0.722 | 0.528 | 0 | T cells | CD27 |
| 0 | 1.080323 | 0.71 | 0.543 | 0 | T cells | TRBC1 |
| 0 | 1.050355 | 0.935 | 0.539 | 0 | T cells | IL32 |
| 0 | 0.820292 | 0.902 | 0.728 | 0 | T cells | LTB |
| 1.61E-105 | 0.895586 | 0.533 | 0.521 | 3.21E-102 | T cells | RPS4Y1 |
| 0 | 6.48811 | 0.987 | 0.239 | 0 | Monocytes | S100A9 |
| 0 | 5.867572 | 0.995 | 0.212 | 0 | Monocytes | LYZ |
| 0 | 5.809339 | 0.947 | 0.182 | 0 | Monocytes | S100A8 |
| 0 | 4.148012 | 0.993 | 0.274 | 0 | Monocytes | CST3 |
| 0 | 4.084256 | 0.924 | 0.209 | 0 | Monocytes | VCAN |
| 0 | 4.030118 | 0.983 | 0.238 | 0 | Monocytes | MNDA |
| 0 | 4.022477 | 0.997 | 0.523 | 0 | Monocytes | CTSS |
| 0 | 3.696307 | 0.973 | 0.19 | 0 | Monocytes | FCN1 |
| 0 | 3.466487 | 0.983 | 0.23 | 0 | Monocytes | LST1 |
| 0 | 3.314755 | 0.929 | 0.224 | 0 | Monocytes | ENSG00000257764 |
| 0 | 3.291989 | 0.987 | 0.384 | 0 | Monocytes | AIF1 |
| 0 | 3.243279 | 0.989 | 0.382 | 0 | Monocytes | PSAP |
| 0 | 3.211873 | 0.997 | 0.775 | 0 | Monocytes | NEAT1 |
| 0 | 3.188724 | 0.983 | 0.235 | 0 | Monocytes | FGL2 |
| 0 | 3.026266 | 0.874 | 0.148 | 0 | Monocytes | S100A12 |
| 0 | 2.969114 | 0.926 | 0.237 | 0 | Monocytes | FOS |
| 0 | 2.967443 | 0.96 | 0.234 | 0 | Monocytes | CYBB |
| 0 | 2.824468 | 0.967 | 0.271 | 0 | Monocytes | TYMP |
| 0 | 2.751715 | 0.993 | 0.56 | 0 | Monocytes | COTL1 |
| 0 | 2.646113 | 0.863 | 0.247 | 0 | Monocytes | CD14 |
| 0 | 2.642231 | 0.92 | 0.165 | 0 | Monocytes | SERPINA1 |
| 0 | 2.625805 | 0.999 | 0.985 | 0 | Monocytes | FTL |
| 0 | 2.609393 | 0.978 | 0.532 | 0 | Monocytes | SAT1 |
| 0 | 2.542928 | 0.991 | 0.349 | 0 | Monocytes | TYROBP |
| 0 | 2.542904 | 0.914 | 0.126 | 0 | Monocytes | MS4A6A |
| 0 | 2.480035 | 0.925 | 0.148 | 0 | Monocytes | CSTA |
| 0 | 2.472068 | 0.886 | 0.128 | 0 | Monocytes | DUSP6 |
| 0 | 2.445908 | 0.95 | 0.236 | 0 | Monocytes | MPEG1 |
| 0 | 2.37451 | 0.973 | 0.517 | 0 | Monocytes | GPX1 |
| 0 | 2.334601 | 0.893 | 0.146 | 0 | Monocytes | CLEC12A |
| 0 | 2.293904 | 0.965 | 0.286 | 0 | Monocytes | FCER1G |
| 0 | 2.290946 | 0.929 | 0.249 | 0 | Monocytes | GRN |
| 0 | 2.28505 | 0.923 | 0.195 | 0 | Monocytes | NCF2 |
| 0 | 2.244298 | 0.967 | 0.387 | 0 | Monocytes | TKT |
| 0 | 2.237232 | 0.988 | 0.652 | 0 | Monocytes | S100A11 |
| 0 | 2.213503 | 0.9 | 0.223 | 0 | Monocytes | KCTD12 |
| 0 | 2.127741 | 0.799 | 0.222 | 0 | Monocytes | NAMPT |
| 0 | 2.117779 | 0.888 | 0.157 | 0 | Monocytes | CLEC7A |
| 0 | 2.11759 | 0.999 | 0.974 | 0 | Monocytes | FTH1 |
| 0 | 2.116668 | 0.84 | 0.157 | 0 | Monocytes | CD36 |
| 0 | 2.116501 | 0.936 | 0.387 | 0 | Monocytes | AP1S2 |
| 0 | 2.092104 | 0.851 | 0.222 | 0 | Monocytes | CSF3R |
| 0 | 2.080998 | 0.886 | 0.154 | 0 | Monocytes | SPI1 |
| 0 | 2.054289 | 0.795 | 0.152 | 0 | Monocytes | MARCKS |
| 0 | 2.050093 | 0.963 | 0.497 | 0 | Monocytes | BRI3 |
| 0 | 2.03701 | 0.933 | 0.348 | 0 | Monocytes | APLP2 |
| 0 | 1.990763 | 0.832 | 0.144 | 0 | Monocytes | CPVL |
| 0 | 1.976751 | 0.994 | 0.912 | 0 | Monocytes | S100A6 |
| 0 | 1.951201 | 0.98 | 0.486 | 0 | Monocytes | LGALS1 |
| 0 | 1.930665 | 0.868 | 0.256 | 0 | Monocytes | STXBP2 |
| 0 | 1.919029 | 0.823 | 0.152 | 0 | Monocytes | LRRK2 |
| 0 | 1.915568 | 0.924 | 0.408 | 0 | Monocytes | CTSD |
| 0 | 1.90258 | 0.853 | 0.165 | 0 | Monocytes | RGS2 |
| 0 | 1.87461 | 0.763 | 0.143 | 0 | Monocytes | CFD |
| 0 | 1.842795 | 0.924 | 0.316 | 0 | Monocytes | DUSP1 |
| 0 | 1.835489 | 0.855 | 0.213 | 0 | Monocytes | TNFSF13B |
| 0 | 1.748077 | 0.985 | 0.434 | 0 | Monocytes | HLA-DRA |
| 0 | 1.728422 | 0.883 | 0.313 | 0 | Monocytes | JAML |
| 0 | 1.720222 | 0.655 | 0.099 | 0 | Monocytes | MS4A7 |
| 0 | 1.717435 | 0.886 | 0.319 | 0 | Monocytes | TNFRSF1B |
| 0 | 1.71381 | 0.847 | 0.312 | 0 | Monocytes | CTSB |
| 0 | 1.707802 | 0.962 | 0.542 | 0 | Monocytes | SAMHD1 |
| 0 | 1.704182 | 0.844 | 0.266 | 0 | Monocytes | LGALS3 |
| 0 | 1.698968 | 0.774 | 0.131 | 0 | Monocytes | SLC11A1 |
| 0 | 1.697655 | 0.885 | 0.283 | 0 | Monocytes | RNF130 |
| 0 | 1.691136 | 0.901 | 0.365 | 0 | Monocytes | ASAH1 |
| 0 | 1.686764 | 0.851 | 0.218 | 0 | Monocytes | CD302 |
| 0 | 1.669774 | 0.94 | 0.383 | 0 | Monocytes | ZEB2 |
| 0 | 1.667173 | 0.79 | 0.169 | 0 | Monocytes | TNFAIP2 |
| 0 | 1.656852 | 0.903 | 0.364 | 0 | Monocytes | ANXA5 |
| 0 | 1.649484 | 0.897 | 0.309 | 0 | Monocytes | LYST |
| 0 | 1.648804 | 0.806 | 0.145 | 0 | Monocytes | DMXL2 |
| 0 | 1.647451 | 0.878 | 0.327 | 0 | Monocytes | CTSZ |
| 0 | 1.635411 | 0.681 | 0.198 | 0 | Monocytes | MIR23AHG |
| 0 | 1.626347 | 0.81 | 0.184 | 0 | Monocytes | CEBPD |
| 0 | 1.623636 | 0.911 | 0.398 | 0 | Monocytes | VSIR |
| 0 | 1.622809 | 0.885 | 0.357 | 0 | Monocytes | VMP1 |
| 0 | 1.61624 | 0.838 | 0.224 | 0 | Monocytes | LYN |
| 0 | 1.612062 | 0.832 | 0.334 | 0 | Monocytes | GCA |
| 0 | 1.60404 | 0.814 | 0.342 | 0 | Monocytes | PECAM1 |
| 0 | 1.595343 | 0.88 | 0.266 | 0 | Monocytes | FGR |
| 0 | 1.592618 | 0.887 | 0.406 | 0 | Monocytes | NPC2 |
| 0 | 1.58898 | 0.905 | 0.406 | 0 | Monocytes | SDCBP |
| 0 | 1.583649 | 0.826 | 0.161 | 0 | Monocytes | CD93 |
| 0 | 1.57393 | 0.747 | 0.115 | 0 | Monocytes | KLF4 |
| 0 | 1.568533 | 0.766 | 0.141 | 0 | Monocytes | ALDH2 |
| 0 | 1.56752 | 0.833 | 0.3 | 0 | Monocytes | BLVRB |
| 0 | 1.566904 | 0.987 | 0.659 | 0 | Monocytes | SRGN |
| 0 | 1.563341 | 0.85 | 0.33 | 0 | Monocytes | FCGRT |
| 0 | 1.559655 | 0.629 | 0.252 | 0 | Monocytes | IFITM3 |
| 0 | 1.554137 | 0.782 | 0.231 | 0 | Monocytes | CPPED1 |
| 0 | 1.550073 | 0.83 | 0.158 | 0 | Monocytes | TGFBI |
| 0 | 1.548138 | 0.772 | 0.177 | 0 | Monocytes | IGSF6 |
| 0 | 1.541597 | 0.808 | 0.259 | 0 | Monocytes | OGFRL1 |
| 0 | 1.529012 | 0.969 | 0.651 | 0 | Monocytes | TSPO |
| 0 | 1.525512 | 0.736 | 0.091 | 0 | Monocytes | SLC7A7 |
| 0 | 1.507448 | 0.991 | 0.883 | 0 | Monocytes | VIM |
| 0 | 1.495654 | 0.686 | 0.219 | 0 | Monocytes | ENSG00000288943 |
| 0 | 1.492582 | 0.732 | 0.266 | 0 | Monocytes | FOSB |
| 0 | 1.483255 | 0.823 | 0.36 | 0 | Monocytes | SOD2 |
| 0 | 1.471359 | 0.843 | 0.243 | 0 | Monocytes | MARCHF1 |
| 0 | 1.464747 | 0.776 | 0.329 | 0 | Monocytes | WDR74 |
| 0 | 1.460374 | 0.683 | 0.108 | 0 | Monocytes | LILRB2 |
| 0 | 1.45666 | 0.828 | 0.352 | 0 | Monocytes | CEBPB |
| 0 | 1.452482 | 0.893 | 0.383 | 0 | Monocytes | MACROH2A1 |
| 0 | 1.449651 | 0.779 | 0.23 | 0 | Monocytes | MEGF9 |
| 0 | 1.445994 | 0.761 | 0.141 | 0 | Monocytes | HCK |
| 0 | 1.441778 | 0.67 | 0.073 | 0 | Monocytes | PELATON |
| 0 | 1.437986 | 0.993 | 0.828 | 0 | Monocytes | S100A4 |
| 0 | 1.433414 | 0.786 | 0.138 | 0 | Monocytes | RAB31 |
| 0 | 1.423817 | 0.691 | 0.246 | 0 | Monocytes | WARS1 |
| 0 | 1.422634 | 0.81 | 0.267 | 0 | Monocytes | ADA2 |
| 0 | 1.421561 | 0.747 | 0.302 | 0 | Monocytes | CCDC88A |
| 0 | 1.420662 | 0.741 | 0.113 | 0 | Monocytes | LMO2 |
| 0 | 1.41775 | 0.684 | 0.032 | 0 | Monocytes | FPR1 |
| 0 | 1.416455 | 0.958 | 0.629 | 0 | Monocytes | GSTP1 |
| 0 | 1.408992 | 0.952 | 0.643 | 0 | Monocytes | ACTR2 |
| 0 | 1.402293 | 0.616 | 0.061 | 0 | Monocytes | CYP1B1 |
| 0 | 1.394248 | 0.888 | 0.453 | 0 | Monocytes | PYCARD |
| 0 | 1.389578 | 0.747 | 0.262 | 0 | Monocytes | PGD |
| 0 | 1.389393 | 0.7 | 0.122 | 0 | Monocytes | PLXDC2 |
| 0 | 1.389222 | 0.904 | 0.444 | 0 | Monocytes | ANXA2 |
| 0 | 1.387082 | 0.71 | 0.129 | 0 | Monocytes | LRRC25 |
| 0 | 1.386662 | 0.73 | 0.178 | 0 | Monocytes | TIMP2 |
| 0 | 1.386377 | 0.715 | 0.052 | 0 | Monocytes | RBP7 |
| 0 | 1.376766 | 0.913 | 0.497 | 0 | Monocytes | FKBP1A |
| 0 | 1.371838 | 0.998 | 0.995 | 0 | Monocytes | ACTB |
| 0 | 1.371255 | 0.739 | 0.083 | 0 | Monocytes | RAB32 |
| 0 | 1.355925 | 0.983 | 0.753 | 0 | Monocytes | LCP1 |
| 0 | 1.353212 | 0.913 | 0.476 | 0 | Monocytes | HLA-DRB1 |
| 0 | 1.340879 | 0.943 | 0.612 | 0 | Monocytes | EVI2B |
| 0 | 1.340022 | 0.948 | 0.578 | 0 | Monocytes | KLF6 |
| 0 | 1.338141 | 0.978 | 0.837 | 0 | Monocytes | GAPDH |
| 0 | 1.334609 | 0.757 | 0.199 | 0 | Monocytes | RXRA |
| 0 | 1.32787 | 0.828 | 0.336 | 0 | Monocytes | IL17RA |
| 0 | 1.327305 | 0.805 | 0.454 | 0 | Monocytes | TNFSF10 |
| 0 | 1.326937 | 0.995 | 0.936 | 0 | Monocytes | OAZ1 |
| 0 | 1.316319 | 0.657 | 0.19 | 0 | Monocytes | KLF10 |
| 0 | 1.312323 | 0.808 | 0.295 | 0 | Monocytes | YBX3 |
| 0 | 1.311841 | 0.693 | 0.108 | 0 | Monocytes | IRAK3 |
| 0 | 1.307413 | 0.741 | 0.311 | 0 | Monocytes | DPYSL2 |
| 0 | 1.303386 | 0.61 | 0.072 | 0 | Monocytes | LGALS2 |
| 0 | 1.298369 | 0.713 | 0.101 | 0 | Monocytes | PLBD1 |
| 0 | 1.294611 | 0.885 | 0.532 | 0 | Monocytes | HLA-DPA1 |
| 0 | 1.288959 | 0.588 | 0.067 | 0 | Monocytes | MAFB |
| 0 | 1.288811 | 0.782 | 0.272 | 0 | Monocytes | PPT1 |
| 0 | 1.288248 | 0.71 | 0.141 | 0 | Monocytes | LRP1 |
| 0 | 1.287077 | 0.689 | 0.288 | 0 | Monocytes | HLA-DRB6 |
| 0 | 1.28673 | 0.951 | 0.544 | 0 | Monocytes | AHNAK |
| 0 | 1.285929 | 0.984 | 0.622 | 0 | Monocytes | CD74 |
| 0 | 1.278179 | 0.846 | 0.342 | 0 | Monocytes | ZFAND5 |
| 0 | 1.274616 | 0.68 | 0.095 | 0 | Monocytes | LILRB3 |
| 0 | 1.272934 | 0.817 | 0.33 | 0 | Monocytes | CASP1 |
| 0 | 1.27258 | 0.629 | 0.188 | 0 | Monocytes | RHOB |
| 0 | 1.268647 | 0.969 | 0.66 | 0 | Monocytes | ANXA1 |
| 0 | 1.264427 | 0.86 | 0.378 | 0 | Monocytes | QKI |
| 0 | 1.264289 | 0.621 | 0.1 | 0 | Monocytes | CD300E |
| 0 | 1.2613 | 0.82 | 0.334 | 0 | Monocytes | HSPA1A |
| 0 | 1.256568 | 0.624 | 0.067 | 0 | Monocytes | LILRA5 |
| 0 | 1.247023 | 0.832 | 0.379 | 0 | Monocytes | POU2F2 |
| 0 | 1.240824 | 0.806 | 0.347 | 0 | Monocytes | ATP6V0D1 |
| 0 | 1.236135 | 0.826 | 0.354 | 0 | Monocytes | NCOA4 |
| 0 | 1.234748 | 0.755 | 0.327 | 0 | Monocytes | ATP6V1B2 |
| 0 | 1.224481 | 0.88 | 0.466 | 0 | Monocytes | MCL1 |
| 0 | 1.223857 | 0.869 | 0.379 | 0 | Monocytes | CMTM6 |
| 0 | 1.213186 | 0.877 | 0.454 | 0 | Monocytes | C1orf162 |
| 0 | 1.212974 | 0.734 | 0.26 | 0 | Monocytes | IFNGR2 |
| 0 | 1.207791 | 0.749 | 0.226 | 0 | Monocytes | CTSH |
| 0 | 1.202174 | 0.871 | 0.365 | 0 | Monocytes | MYO1F |
| 0 | 1.199041 | 0.717 | 0.275 | 0 | Monocytes | SNX10 |
| 0 | 1.198605 | 0.863 | 0.527 | 0 | Monocytes | TALDO1 |
| 0 | 1.19786 | 0.879 | 0.45 | 0 | Monocytes | GLIPR1 |
| 0 | 1.187611 | 0.696 | 0.099 | 0 | Monocytes | PRAM1 |
| 0 | 1.186957 | 0.963 | 0.811 | 0 | Monocytes | S100A10 |
| 0 | 1.186405 | 0.812 | 0.322 | 0 | Monocytes | SKAP2 |
| 0 | 1.185161 | 0.706 | 0.22 | 0 | Monocytes | GNS |
| 0 | 1.178822 | 0.67 | 0.232 | 0 | Monocytes | STX11 |
| 0 | 1.164579 | 0.727 | 0.316 | 0 | Monocytes | NUP214 |
| 0 | 1.162892 | 0.751 | 0.339 | 0 | Monocytes | DPYD |
| 0 | 1.162297 | 0.705 | 0.245 | 0 | Monocytes | ENSG00000287979 |
| 0 | 1.158632 | 0.793 | 0.307 | 0 | Monocytes | RAB11FIP1 |
| 0 | 1.157988 | 0.565 | 0.08 | 0 | Monocytes | CSF1R |
| 0 | 1.154948 | 0.749 | 0.315 | 0 | Monocytes | LAP3 |
| 0 | 1.154934 | 0.657 | 0.02 | 0 | Monocytes | ENSG00000255197 |
| 0 | 1.153521 | 0.724 | 0.278 | 0 | Monocytes | SH3BP2 |
| 0 | 1.151538 | 0.747 | 0.38 | 0 | Monocytes | LTA4H |
| 0 | 1.151356 | 0.602 | 0.134 | 0 | Monocytes | TMEM176B |
| 0 | 1.144662 | 0.858 | 0.476 | 0 | Monocytes | VASP |
| 0 | 1.143406 | 0.743 | 0.244 | 0 | Monocytes | RNASE6 |
| 0 | 1.133326 | 0.779 | 0.333 | 0 | Monocytes | RNF149 |
| 0 | 1.132641 | 0.796 | 0.386 | 0 | Monocytes | CD4 |
| 0 | 1.119712 | 0.747 | 0.223 | 0 | Monocytes | BACH1 |
| 0 | 1.113182 | 0.543 | 0.053 | 0 | Monocytes | C5AR1 |
| 0 | 1.11086 | 0.834 | 0.377 | 0 | Monocytes | NFKBIA |
| 0 | 1.11058 | 0.737 | 0.266 | 0 | Monocytes | CRTAP |
| 0 | 1.109619 | 0.71 | 0.335 | 0 | Monocytes | MYADM |
| 0 | 1.10917 | 0.665 | 0.143 | 0 | Monocytes | RGS18 |
| 0 | 1.105168 | 0.67 | 0.185 | 0 | Monocytes | LILRB1 |
| 0 | 1.101821 | 0.735 | 0.312 | 0 | Monocytes | PTPRE |
| 0 | 1.099506 | 0.701 | 0.243 | 0 | Monocytes | LGALS9 |
| 0 | 1.098814 | 0.635 | 0.3 | 0 | Monocytes | SCO2 |
| 0 | 1.091373 | 0.797 | 0.404 | 0 | Monocytes | HSBP1 |
| 0 | 1.090844 | 0.708 | 0.237 | 0 | Monocytes | GLUL |
| 0 | 1.090502 | 0.661 | 0.273 | 0 | Monocytes | CAPG |
| 0 | 1.084502 | 0.619 | 0.079 | 0 | Monocytes | CDA |
| 0 | 1.084366 | 0.804 | 0.444 | 0 | Monocytes | PLEKHO1 |
| 0 | 1.079182 | 0.685 | 0.286 | 0 | Monocytes | SCPEP1 |
| 0 | 1.07705 | 0.756 | 0.309 | 0 | Monocytes | TPP1 |
| 0 | 1.076007 | 0.773 | 0.282 | 0 | Monocytes | AOAH |
| 0 | 1.06785 | 0.735 | 0.295 | 0 | Monocytes | KIAA0930 |
| 0 | 1.063409 | 0.758 | 0.345 | 0 | Monocytes | HLA-DMB |
| 0 | 1.062257 | 0.728 | 0.274 | 0 | Monocytes | NFKBIZ |
| 0 | 1.060316 | 0.64 | 0.045 | 0 | Monocytes | P2RY13 |
| 0 | 1.059688 | 0.762 | 0.348 | 0 | Monocytes | MIDN |
| 0 | 1.049888 | 0.617 | 0.099 | 0 | Monocytes | TLR2 |
| 0 | 1.047661 | 0.669 | 0.227 | 0 | Monocytes | PLXNC1 |
| 0 | 1.040878 | 0.694 | 0.299 | 0 | Monocytes | UBE2D1 |
| 0 | 1.03234 | 0.66 | 0.101 | 0 | Monocytes | ZNF385A |
| 0 | 1.030518 | 0.946 | 0.6 | 0 | Monocytes | JUNB |
| 0 | 1.026129 | 0.814 | 0.401 | 0 | Monocytes | ZNF106 |
| 0 | 1.026046 | 0.739 | 0.219 | 0 | Monocytes | RASSF4 |
| 0 | 1.022207 | 0.805 | 0.338 | 0 | Monocytes | ZFP36 |
| 0 | 1.021428 | 0.699 | 0.245 | 0 | Monocytes | TET2 |
| 0 | 1.011672 | 0.721 | 0.162 | 0 | Monocytes | SYK |
| 0 | 1.006157 | 0.867 | 0.552 | 0 | Monocytes | ZFP36L1 |
| 0 | 1.005531 | 0.641 | 0.051 | 0 | Monocytes | HNMT |
| 0 | 1.004915 | 0.657 | 0.034 | 0 | Monocytes | TLR4 |
| 0 | 1.001347 | 0.641 | 0.096 | 0 | Monocytes | RBM47 |
| 0 | 1.001343 | 0.595 | 0.117 | 0 | Monocytes | HMOX1 |
| 0 | 0.999521 | 0.566 | 0.04 | 0 | Monocytes | GASK1B |
| 0 | 0.993522 | 0.604 | 0.115 | 0 | Monocytes | SHTN1 |
| 0 | 0.993065 | 0.606 | 0.029 | 0 | Monocytes | NFAM1 |
| 0 | 0.992782 | 0.609 | 0.041 | 0 | Monocytes | IL13RA1 |
| 0 | 0.992004 | 0.721 | 0.114 | 0 | Monocytes | ENSG00000279166 |
| 0 | 0.991734 | 0.601 | 0.253 | 0 | Monocytes | ENSG00000285646 |
| 0 | 0.986172 | 0.721 | 0.407 | 0 | Monocytes | EVI2A |
| 0 | 0.978216 | 0.577 | 0.141 | 0 | Monocytes | PLXNB2 |
| 0 | 0.975248 | 0.903 | 0.54 | 0 | Monocytes | SERPINB1 |
| 0 | 0.975118 | 0.744 | 0.406 | 0 | Monocytes | TIMP1 |
| 0 | 0.970301 | 0.664 | 0.064 | 0 | Monocytes | CD300LF |
| 0 | 0.966606 | 0.673 | 0.052 | 0 | Monocytes | CD86 |
| 0 | 0.963187 | 0.63 | 0.161 | 0 | Monocytes | GAS7 |
| 0 | 0.962539 | 0.635 | 0.243 | 0 | Monocytes | PIK3AP1 |
| 0 | 0.958237 | 0.574 | 0.06 | 0 | Monocytes | CD163 |
| 0 | 0.954408 | 0.687 | 0.301 | 0 | Monocytes | GNAQ |
| 0 | 0.954149 | 0.592 | 0.157 | 0 | Monocytes | TBXAS1 |
| 0 | 0.944655 | 0.697 | 0.288 | 0 | Monocytes | NOTCH2 |
| 0 | 0.942016 | 0.735 | 0.38 | 0 | Monocytes | BNIP3L |
| 0 | 0.939503 | 0.656 | 0.145 | 0 | Monocytes | CCR2 |
| 0 | 0.932754 | 0.675 | 0.283 | 0 | Monocytes | NRGN |
| 0 | 0.928132 | 0.55 | 0.043 | 0 | Monocytes | ASGR1 |
| 0 | 0.927982 | 0.728 | 0.238 | 0 | Monocytes | LY86 |
| 0 | 0.92689 | 0.644 | 0.216 | 0 | Monocytes | JAK2 |
| 0 | 0.924515 | 0.657 | 0.311 | 0 | Monocytes | THEMIS2 |
| 0 | 0.919661 | 0.716 | 0.247 | 0 | Monocytes | ITGAM |
| 0 | 0.917544 | 0.617 | 0.257 | 0 | Monocytes | PLSCR1 |
| 0 | 0.913594 | 0.659 | 0.111 | 0 | Monocytes | LILRA2 |
| 0 | 0.910379 | 0.592 | 0.048 | 0 | Monocytes | CREB5 |
| 0 | 0.909706 | 0.687 | 0.17 | 0 | Monocytes | MIR223HG |
| 0 | 0.909456 | 0.556 | 0.082 | 0 | Monocytes | SLC8A1 |
| 0 | 0.904739 | 0.691 | 0.176 | 0 | Monocytes | ENTPD1 |
| 0 | 0.903952 | 0.649 | 0.112 | 0 | Monocytes | CCR1 |
| 0 | 0.902796 | 0.847 | 0.546 | 0 | Monocytes | PTPN6 |
| 0 | 0.901259 | 0.606 | 0.122 | 0 | Monocytes | BST1 |
| 0 | 0.901109 | 0.939 | 0.722 | 0 | Monocytes | IER2 |
| 0 | 0.899888 | 0.595 | 0.091 | 0 | Monocytes | OSCAR |
| 0 | 0.899757 | 0.621 | 0.232 | 0 | Monocytes | CKAP4 |
| 0 | 0.899495 | 0.72 | 0.226 | 0 | Monocytes | HHEX |
| 0 | 0.899422 | 0.598 | 0.054 | 0 | Monocytes | MGST1 |
| 0 | 0.895306 | 0.668 | 0.06 | 0 | Monocytes | PYGL |
| 0 | 0.895299 | 0.639 | 0.06 | 0 | Monocytes | TFEC |
| 0 | 0.891799 | 0.615 | 0.244 | 0 | Monocytes | PAK1 |
| 0 | 0.888842 | 0.599 | 0.174 | 0 | Monocytes | GRK3 |
| 0 | 0.886199 | 0.855 | 0.416 | 0 | Monocytes | CANX |
| 0 | 0.88567 | 0.598 | 0.214 | 0 | Monocytes | SIRPB1 |
| 0 | 0.882746 | 0.759 | 0.272 | 0 | Monocytes | MEF2C |
| 0 | 0.877691 | 0.655 | 0.272 | 0 | Monocytes | C9orf72 |
| 0 | 0.872687 | 0.685 | 0.284 | 0 | Monocytes | ATP6V1A |
| 0 | 0.865108 | 0.591 | 0.106 | 0 | Monocytes | PTAFR |
| 0 | 0.864024 | 0.696 | 0.278 | 0 | Monocytes | NAIP |
| 0 | 0.86045 | 0.615 | 0.23 | 0 | Monocytes | RAB3D |
| 0 | 0.855697 | 0.595 | 0.076 | 0 | Monocytes | SIRPA |
| 0 | 0.852443 | 0.598 | 0.178 | 0 | Monocytes | ALOX5 |
| 0 | 0.850849 | 0.605 | 0.244 | 0 | Monocytes | LACTB |
| 0 | 0.844127 | 0.725 | 0.385 | 0 | Monocytes | HLA-DMA |
| 0 | 0.843839 | 0.601 | 0.16 | 0 | Monocytes | CYRIA |
| 0 | 0.843561 | 0.609 | 0.144 | 0 | Monocytes | FES |
| 0 | 0.843313 | 0.739 | 0.347 | 0 | Monocytes | CAT |
| 0 | 0.842382 | 0.578 | 0.038 | 0 | Monocytes | SLC24A4 |
| 0 | 0.842246 | 0.597 | 0.059 | 0 | Monocytes | FGD4 |
| 0 | 0.842011 | 0.636 | 0.227 | 0 | Monocytes | LY96 |
| 0 | 0.839881 | 0.577 | 0.109 | 0 | Monocytes | CD33 |
| 0 | 0.837209 | 0.606 | 0.231 | 0 | Monocytes | ACER3 |
| 0 | 0.832811 | 0.534 | 0.063 | 0 | Monocytes | TLR8 |
| 0 | 0.818574 | 0.869 | 0.63 | 0 | Monocytes | PRELID1 |
| 0 | 0.817043 | 0.625 | 0.177 | 0 | Monocytes | GNB4 |
| 0 | 0.81613 | 0.7 | 0.254 | 0 | Monocytes | BAZ2B |
| 0 | 0.809716 | 0.606 | 0.061 | 0 | Monocytes | LILRA1 |
| 0 | 0.78406 | 0.59 | 0.029 | 0 | Monocytes | MEFV |
| 0 | 0.767821 | 0.568 | 0.024 | 0 | Monocytes | KCNE3 |
| 0 | 0.76355 | 0.553 | 0.134 | 0 | Monocytes | SLC15A3 |
| 0 | 0.7621 | 0.582 | 0.08 | 0 | Monocytes | CD1D |
| 0 | 0.759592 | 0.531 | 0.048 | 0 | Monocytes | NRG1 |
| 0 | 0.758559 | 0.571 | 0.198 | 0 | Monocytes | CREG1 |
| 0 | 0.753822 | 0.644 | 0.035 | 0 | Monocytes | NFE2 |
| 0 | 0.752075 | 0.643 | 0.283 | 0 | Monocytes | VNN2 |
| 0 | 0.737848 | 0.546 | 0.098 | 0 | Monocytes | FCGR2A |
| 0 | 0.735082 | 0.627 | 0.159 | 0 | Monocytes | SCIMP |
| 0 | 0.726182 | 0.509 | 0.061 | 0 | Monocytes | LPCAT2 |
| 0 | 0.725711 | 0.56 | 0.092 | 0 | Monocytes | DOCK5 |
| 0 | 0.725299 | 0.661 | 0.051 | 0 | Monocytes | SIGLEC14 |
| 0 | 0.709554 | 0.723 | 0.274 | 0 | Monocytes | LIPA |
| 0 | 0.699756 | 0.743 | 0.349 | 0 | Monocytes | HERPUD1 |
| 0 | 0.694591 | 0.511 | 0.039 | 0 | Monocytes | CSF2RA |
| 0 | 0.690264 | 0.585 | 0.089 | 0 | Monocytes | SEMA4A |
| 0 | 0.680608 | 0.565 | 0.168 | 0 | Monocytes | TTYH3 |
| 0 | 0.653196 | 0.786 | 0.391 | 0 | Monocytes | STX7 |
| 0 | 0.60471 | 0.525 | 0.026 | 0 | Monocytes | ENSG00000260078 |
| 0 | 0.594575 | 0.564 | 0.066 | 0 | Monocytes | QPCT |
| 0 | 0.594046 | 0.89 | 0.452 | 0 | Monocytes | EFHD2 |
| 2.10E-303 | 1.016378 | 0.569 | 0.141 | 4.20E-300 | Monocytes | PILRA |
| 5.19E-302 | 0.683466 | 0.53 | 0.12 | 1.04E-298 | Monocytes | EVI5 |
| 6.26E-302 | 0.776765 | 0.563 | 0.186 | 1.25E-298 | Monocytes | MCTP1 |
| 3.41E-301 | 0.857931 | 0.605 | 0.22 | 6.81E-298 | Monocytes | METTL7A |
| 8.75E-296 | 0.741988 | 0.652 | 0.306 | 1.75E-292 | Monocytes | IL6R |
| 2.49E-295 | 0.907668 | 0.537 | 0.096 | 4.98E-292 | Monocytes | ADGRE2 |
| 1.67E-294 | 0.842139 | 0.511 | 0.075 | 3.33E-291 | Monocytes | TMEM176A |
| 7.96E-294 | 1.005228 | 0.633 | 0.273 | 1.59E-290 | Monocytes | RASSF2 |
| 1.69E-290 | 0.91884 | 0.543 | 0.084 | 3.37E-287 | Monocytes | C19orf38 |
| 7.53E-289 | 0.764462 | 0.545 | 0.14 | 1.51E-285 | Monocytes | CEBPA |
| 4.62E-288 | 0.649531 | 0.515 | 0.072 | 9.24E-285 | Monocytes | KYNU |
| 7.98E-282 | 0.713559 | 0.662 | 0.346 | 1.60E-278 | Monocytes | DAPP1 |
| 2.67E-279 | 1.202098 | 0.698 | 0.363 | 5.35E-276 | Monocytes | HLA-DRB5 |
| 3.64E-273 | 0.907549 | 0.607 | 0.262 | 7.29E-270 | Monocytes | GRINA |
| 3.54E-271 | 0.670427 | 0.519 | 0.199 | 7.08E-268 | Monocytes | ENSG00000287190 |
| 3.55E-269 | 0.656545 | 0.502 | 0.084 | 7.11E-266 | Monocytes | CSF2RB |
| 5.04E-267 | 0.776163 | 0.57 | 0.225 | 1.01E-263 | Monocytes | SH2B3 |
| 1.16E-264 | 0.612811 | 0.635 | 0.287 | 2.33E-261 | Monocytes | RPN1 |
| 2.93E-264 | 0.801048 | 0.604 | 0.279 | 5.87E-261 | Monocytes | RHOQ |
| 2.27E-263 | 0.953261 | 0.607 | 0.297 | 4.55E-260 | Monocytes | NCF1C |
| 1.42E-255 | 0.600596 | 0.592 | 0.314 | 2.83E-252 | Monocytes | SPECC1 |
| 8.48E-247 | 0.613299 | 0.546 | 0.125 | 1.70E-243 | Monocytes | BTK |
| 5.21E-245 | 0.763537 | 0.631 | 0.312 | 1.04E-241 | Monocytes | BID |
| 9.17E-245 | 0.935601 | 0.581 | 0.257 | 1.83E-241 | Monocytes | EMILIN2 |
| 1.20E-244 | 0.591422 | 0.699 | 0.386 | 2.40E-241 | Monocytes | XAF1 |
| 2.24E-242 | 0.626978 | 0.573 | 0.258 | 4.48E-239 | Monocytes | SNX18 |
| 6.71E-240 | 0.654755 | 0.508 | 0.127 | 1.34E-236 | Monocytes | STAB1 |
| 1.59E-234 | 0.582284 | 0.556 | 0.265 | 3.19E-231 | Monocytes | SOX4 |
| 8.54E-230 | 0.642158 | 0.567 | 0.197 | 1.71E-226 | Monocytes | NAPSB |
| 3.19E-226 | 0.933997 | 0.567 | 0.236 | 6.37E-223 | Monocytes | AHR |
| 6.87E-224 | 0.654363 | 0.661 | 0.363 | 1.37E-220 | Monocytes | TMEM154 |
| 4.21E-223 | 0.822028 | 0.576 | 0.214 | 8.42E-220 | Monocytes | ITGAX |
| 5.01E-221 | 0.778319 | 0.576 | 0.245 | 1.00E-217 | Monocytes | ENSG00000279602 |
| 7.62E-221 | 0.658258 | 0.567 | 0.24 | 1.52E-217 | Monocytes | LYL1 |
| 3.91E-220 | 0.772388 | 0.557 | 0.232 | 7.82E-217 | Monocytes | SMCO4 |
| 5.45E-218 | 0.649924 | 0.687 | 0.38 | 1.09E-214 | Monocytes | PARP14 |
| 4.12E-213 | 0.830513 | 0.538 | 0.184 | 8.24E-210 | Monocytes | SLC43A2 |
| 1.98E-211 | 0.584466 | 0.84 | 0.573 | 3.96E-208 | Monocytes | SNX3 |
| 2.14E-199 | 0.605496 | 0.54 | 0.261 | 4.29E-196 | Monocytes | DSE |
| 2.73E-197 | 0.711782 | 0.511 | 0.155 | 5.46E-194 | Monocytes | ZFHX3 |
| 1.31E-194 | 0.641892 | 0.538 | 0.222 | 2.63E-191 | Monocytes | TESC |
| 1.82E-191 | 0.684688 | 0.648 | 0.33 | 3.63E-188 | Monocytes | HLA-DQB1 |
| 3.02E-187 | 0.606381 | 0.517 | 0.202 | 6.04E-184 | Monocytes | CR1 |
| 4.22E-185 | 0.789497 | 0.572 | 0.339 | 8.44E-182 | Monocytes | IFI44L |
| 6.90E-185 | 0.711333 | 0.577 | 0.277 | 1.38E-181 | Monocytes | MYD88 |
| 1.91E-181 | 0.836891 | 0.54 | 0.24 | 3.82E-178 | Monocytes | PPM1F |
| 2.97E-179 | 0.744636 | 0.836 | 0.659 | 5.94E-176 | Monocytes | XIST |
| 3.29E-179 | 0.676614 | 0.66 | 0.375 | 6.59E-176 | Monocytes | MIS18BP1 |
| 1.72E-178 | 0.677309 | 0.854 | 0.644 | 3.43E-175 | Monocytes | HLA-DPB1 |
| 4.26E-172 | 0.722516 | 0.58 | 0.278 | 8.51E-169 | Monocytes | CUX1 |
| 8.44E-172 | 0.787832 | 0.646 | 0.406 | 1.69E-168 | Monocytes | IER5 |
| 5.89E-170 | 0.615818 | 0.775 | 0.486 | 1.18E-166 | Monocytes | IRF1 |
| 2.08E-168 | 0.751593 | 0.546 | 0.25 | 4.15E-165 | Monocytes | CORO1C |
| 3.84E-163 | 0.667006 | 0.659 | 0.391 | 7.67E-160 | Monocytes | ATP2B1 |
| 4.27E-161 | 0.616122 | 0.609 | 0.354 | 8.54E-158 | Monocytes | UBE2J1 |
| 7.23E-160 | 0.591872 | 0.556 | 0.275 | 1.45E-156 | Monocytes | SEC14L1 |
| 3.87E-154 | 0.862856 | 0.519 | 0.218 | 7.75E-151 | Monocytes | TMEM170B |
| 1.83E-153 | 0.59923 | 0.521 | 0.229 | 3.66E-150 | Monocytes | SCARB2 |
| 1.95E-149 | 0.620901 | 0.518 | 0.243 | 3.91E-146 | Monocytes | KCNK6 |
| 1.24E-120 | 0.715074 | 0.514 | 0.272 | 2.48E-117 | Monocytes | C15orf39 |
| 3.24E-112 | 0.768468 | 0.633 | 0.393 | 6.49E-109 | Monocytes | MT2A |
| 4.41E-94 | 0.694495 | 0.668 | 0.451 | 8.82E-91 | Monocytes | ISG15 |
| 1.18E-89 | 0.656856 | 0.532 | 0.311 | 2.36E-86 | Monocytes | SLC2A3 |
| 1.40E-67 | 0.606518 | 0.514 | 0.341 | 2.81E-64 | Monocytes | MX1 |
| 0 | 3.912448 | 0.994 | 0.353 | 0 | NK cells | GNLY |
| 0 | 3.007059 | 0.997 | 0.399 | 0 | NK cells | NKG7 |
| 0 | 2.816093 | 0.933 | 0.278 | 0 | NK cells | GZMB |
| 0 | 2.713856 | 0.893 | 0.273 | 0 | NK cells | FGFBP2 |
| 0 | 2.710659 | 0.97 | 0.309 | 0 | NK cells | PRF1 |
| 0 | 2.595585 | 0.917 | 0.269 | 0 | NK cells | TRDC |
| 0 | 2.58892 | 0.969 | 0.302 | 0 | NK cells | KLRD1 |
| 0 | 2.545916 | 0.903 | 0.243 | 0 | NK cells | KLRF1 |
| 0 | 2.422948 | 0.979 | 0.391 | 0 | NK cells | CST7 |
| 0 | 2.41112 | 0.799 | 0.234 | 0 | NK cells | SPON2 |
| 0 | 2.374635 | 0.974 | 0.36 | 0 | NK cells | GZMA |
| 0 | 2.352547 | 0.959 | 0.399 | 0 | NK cells | CTSW |
| 0 | 2.338318 | 0.931 | 0.31 | 0 | NK cells | HOPX |
| 0 | 2.300672 | 0.745 | 0.255 | 0 | NK cells | CLIC3 |
| 0 | 2.185951 | 0.826 | 0.283 | 0 | NK cells | CCL4 |
| 0 | 1.997372 | 0.935 | 0.439 | 0 | NK cells | CCL5 |
| 0 | 1.931323 | 0.926 | 0.315 | 0 | NK cells | FCGR3A |
| 0 | 1.926743 | 0.863 | 0.328 | 0 | NK cells | KLRB1 |
| 0 | 1.919498 | 0.658 | 0.126 | 0 | NK cells | KLRC1 |
| 0 | 1.91302 | 0.752 | 0.281 | 0 | NK cells | IL2RB |
| 0 | 1.850678 | 0.882 | 0.32 | 0 | NK cells | GZMH |
| 0 | 1.741804 | 0.846 | 0.284 | 0 | NK cells | CX3CR1 |
| 0 | 1.67302 | 0.935 | 0.447 | 0 | NK cells | EFHD2 |
| 0 | 1.571682 | 0.907 | 0.46 | 0 | NK cells | PLEK |
| 0 | 1.51183 | 0.713 | 0.363 | 0 | NK cells | CMC1 |
| 0 | 1.497814 | 0.846 | 0.475 | 0 | NK cells | ID2 |
| 0 | 1.468421 | 0.681 | 0.219 | 0 | NK cells | ADGRG1 |
| 0 | 1.427706 | 0.954 | 0.358 | 0 | NK cells | TYROBP |
| 0 | 1.396634 | 0.722 | 0.271 | 0 | NK cells | LAIR2 |
| 0 | 1.348483 | 0.734 | 0.327 | 0 | NK cells | FCER1G |
| 0 | 1.324169 | 0.775 | 0.154 | 0 | NK cells | XCL2 |
| 0 | 1.243496 | 0.602 | 0.137 | 0 | NK cells | KLRC2 |
| 0 | 1.110774 | 0.666 | 0.235 | 0 | NK cells | TRGC1 |
| 0 | 1.103918 | 0.961 | 0.664 | 0 | NK cells | SRGN |
| 0 | 1.100018 | 0.779 | 0.402 | 0 | NK cells | C12orf75 |
| 0 | 0.949716 | 0.961 | 0.857 | 0 | NK cells | UBB |
| 0 | 0.943119 | 0.638 | 0.178 | 0 | NK cells | ENSG00000289137 |
| 0 | 0.848778 | 0.667 | 0.21 | 0 | NK cells | SLAMF7 |
| 0 | 0.796191 | 0.683 | 0.324 | 0 | NK cells | ABI3 |
| 0 | 0.771622 | 0.557 | 0.127 | 0 | NK cells | CCL4L2 |
| 0 | 0.586465 | 0.579 | 0.133 | 0 | NK cells | TNFRSF18 |
| 4.14E-299 | 1.213412 | 0.655 | 0.266 | 8.28E-296 | NK cells | MYBL1 |
| 9.61E-290 | 2.370925 | 0.553 | 0.124 | 1.92E-286 | NK cells | PTGDS |
| 1.22E-258 | 0.595437 | 0.595 | 0.213 | 2.45E-255 | NK cells | ITGAX |
| 1.15E-249 | 0.79257 | 0.541 | 0.159 | 2.30E-246 | NK cells | CCL3 |
| 2.00E-245 | 0.683097 | 0.928 | 0.763 | 4.01E-242 | NK cells | LCP1 |
| 1.42E-242 | 2.709311 | 0.621 | 0.26 | 2.84E-239 | NK cells | MYOM2 |
| 4.40E-232 | 1.125529 | 0.565 | 0.203 | 8.81E-229 | NK cells | AKR1C3 |
| 5.74E-226 | 0.991061 | 0.623 | 0.291 | 1.15E-222 | NK cells | RHOC |
| 6.33E-218 | 0.681931 | 0.854 | 0.647 | 1.27E-214 | NK cells | GSTP1 |
| 1.33E-217 | 1.058826 | 0.71 | 0.469 | 2.66E-214 | NK cells | ALOX5AP |
| 1.08E-201 | 0.89707 | 0.539 | 0.216 | 2.16E-198 | NK cells | S100B |
| 3.44E-201 | 1.319764 | 0.549 | 0.156 | 6.87E-198 | NK cells | CD160 |
| 7.64E-198 | 0.877124 | 0.792 | 0.599 | 1.53E-194 | NK cells | CALR |
| 1.90E-163 | 0.805832 | 0.67 | 0.38 | 3.80E-160 | NK cells | LINC01871 |
| 1.47E-155 | 1.226355 | 0.549 | 0.174 | 2.94E-152 | NK cells | PRSS23 |
| 1.80E-146 | 0.964696 | 0.538 | 0.169 | 3.59E-143 | NK cells | FCRL6 |
| 1.00E-144 | 0.880687 | 0.648 | 0.411 | 2.01E-141 | NK cells | XBP1 |
| 7.39E-141 | 0.698645 | 0.718 | 0.422 | 1.48E-137 | NK cells | ZEB2 |
| 1.36E-133 | 0.614184 | 0.821 | 0.734 | 2.73E-130 | NK cells | PPIB |
| 6.46E-112 | 0.672259 | 0.651 | 0.404 | 1.29E-108 | NK cells | MYO1F |
| 2.12E-105 | 1.022103 | 0.585 | 0.368 | 4.25E-102 | NK cells | NCR3 |
| 7.67E-85 | 1.087212 | 0.531 | 0.295 | 1.53E-81 | NK cells | CEP78 |
| 6.19E-66 | 0.67597 | 0.533 | 0.299 | 1.24E-62 | NK cells | CXXC5 |
| 0 | 4.434563 | 0.85 | 0.459 | 0 | B cells | IGHM |
| 0 | 3.863982 | 0.822 | 0.685 | 0 | B cells | IGKC |
| 0 | 3.608966 | 0.968 | 0.28 | 0 | B cells | MS4A1 |
| 0 | 3.501868 | 0.975 | 0.4 | 0 | B cells | CD79A |
| 0 | 3.140169 | 0.996 | 0.46 | 0 | B cells | HLA-DRA |
| 0 | 3.022952 | 0.998 | 0.639 | 0 | B cells | CD74 |
| 0 | 2.836661 | 0.948 | 0.373 | 0 | B cells | CD79B |
| 0 | 2.736357 | 0.61 | 0.155 | 0 | B cells | TCL1A |
| 0 | 2.634881 | 0.956 | 0.291 | 0 | B cells | HLA-DQA1 |
| 0 | 2.605131 | 0.994 | 0.489 | 0 | B cells | HLA-DRB1 |
| 0 | 2.586795 | 0.694 | 0.219 | 0 | B cells | IGHD |
| 0 | 2.530164 | 0.993 | 0.639 | 0 | B cells | HLA-DPB1 |
| 0 | 2.49586 | 0.845 | 0.167 | 0 | B cells | BANK1 |
| 0 | 2.334626 | 0.931 | 0.315 | 0 | B cells | HLA-DQB1 |
| 0 | 2.27666 | 0.988 | 0.538 | 0 | B cells | HLA-DPA1 |
| 0 | 2.267203 | 0.801 | 0.257 | 0 | B cells | LINC00926 |
| 0 | 2.235191 | 0.82 | 0.304 | 0 | B cells | RALGPS2 |
| 0 | 2.080374 | 0.829 | 0.289 | 0 | B cells | MEF2C |
| 0 | 2.026874 | 0.711 | 0.144 | 0 | B cells | VPREB3 |
| 0 | 1.97491 | 0.766 | 0.157 | 0 | B cells | BCL11A |
| 0 | 1.913731 | 0.693 | 0.132 | 0 | B cells | FCRL1 |
| 0 | 1.85211 | 0.676 | 0.151 | 0 | B cells | TCF4 |
| 0 | 1.791316 | 0.712 | 0.252 | 0 | B cells | AFF3 |
| 0 | 1.754456 | 0.853 | 0.388 | 0 | B cells | HLA-DMA |
| 0 | 1.734571 | 0.688 | 0.171 | 0 | B cells | TNFRSF13C |
| 0 | 1.702184 | 0.75 | 0.359 | 0 | B cells | HVCN1 |
| 0 | 1.671091 | 0.596 | 0.12 | 0 | B cells | FCER2 |
| 0 | 1.658895 | 0.847 | 0.363 | 0 | B cells | HLA-DRB5 |
| 0 | 1.499479 | 0.608 | 0.14 | 0 | B cells | CD22 |
| 0 | 1.469149 | 0.746 | 0.415 | 0 | B cells | STX7 |
| 0 | 1.455183 | 0.62 | 0.183 | 0 | B cells | NIBAN3 |
| 0 | 1.41893 | 0.642 | 0.291 | 0 | B cells | SWAP70 |
| 0 | 1.402378 | 0.597 | 0.142 | 0 | B cells | SPIB |
| 0 | 1.395608 | 0.572 | 0.108 | 0 | B cells | LINC02397 |
| 0 | 1.39519 | 0.747 | 0.284 | 0 | B cells | MARCHF1 |
| 0 | 1.392335 | 0.575 | 0.101 | 0 | B cells | CD24 |
| 0 | 1.392032 | 0.74 | 0.368 | 0 | B cells | HLA-DMB |
| 0 | 1.382687 | 0.57 | 0.26 | 0 | B cells | IRF8 |
| 0 | 1.372906 | 0.567 | 0.11 | 0 | B cells | PAX5 |
| 0 | 1.367365 | 0.576 | 0.269 | 0 | B cells | P2RX5 |
| 0 | 1.327982 | 0.645 | 0.153 | 0 | B cells | GAPT |
| 0 | 1.22959 | 0.525 | 0.093 | 0 | B cells | ADAM28 |
| 0 | 1.184004 | 0.972 | 0.82 | 0 | B cells | LTB |
| 0 | 1.158135 | 0.568 | 0.229 | 0 | B cells | CD40 |
| 0 | 1.154656 | 0.579 | 0.239 | 0 | B cells | PDLIM1 |
| 0 | 1.152921 | 0.539 | 0.114 | 0 | B cells | HLA-DOB |
| 0 | 1.12796 | 0.56 | 0.216 | 0 | B cells | NAPSB |
| 0 | 1.125562 | 0.538 | 0.064 | 0 | B cells | FCRLA |
| 0 | 1.096375 | 0.5 | 0.087 | 0 | B cells | FCRL2 |
| 0 | 1.026619 | 0.5 | 0.13 | 0 | B cells | RUBCNL |
| 0 | 1.01479 | 0.506 | 0.111 | 0 | B cells | BLNK |
| 2.15E-284 | 1.023231 | 0.514 | 0.186 | 4.30E-281 | B cells | BASP1 |
| 7.96E-283 | 1.090538 | 0.712 | 0.415 | 1.59E-279 | B cells | POU2F2 |
| 2.03E-258 | 0.907042 | 0.533 | 0.278 | 4.06E-255 | B cells | TPD52 |
| 9.52E-254 | 1.340859 | 0.537 | 0.309 | 1.90E-250 | B cells | PLPP5 |
| 2.29E-251 | 1.153946 | 0.627 | 0.356 | 4.57E-248 | B cells | BIRC3 |
| 3.28E-244 | 0.986896 | 0.535 | 0.292 | 6.57E-241 | B cells | SEL1L3 |
| 8.57E-240 | 3.660536 | 0.669 | 0.561 | 1.71E-236 | B cells | IGLC2 |
| 1.80E-234 | 0.917902 | 0.609 | 0.317 | 3.61E-231 | B cells | HLA-DRB6 |
| 2.42E-234 | 0.780168 | 0.673 | 0.378 | 4.84E-231 | B cells | CTSZ |
| 4.31E-229 | 0.987776 | 0.557 | 0.282 | 8.62E-226 | B cells | LY86 |
| 2.29E-227 | 1.207132 | 0.536 | 0.293 | 4.57E-224 | B cells | EAF2 |
| 5.83E-219 | 0.98024 | 0.568 | 0.306 | 1.17E-215 | B cells | CXXC5 |
| 1.85E-213 | 0.927544 | 0.599 | 0.385 | 3.69E-210 | B cells | TMEM154 |
| 1.76E-203 | 1.090978 | 0.539 | 0.331 | 3.53E-200 | B cells | GNG7 |
| 3.84E-203 | 0.959717 | 0.542 | 0.322 | 7.68E-200 | B cells | SMIM14 |
| 2.35E-193 | 0.672652 | 0.512 | 0.216 | 4.71E-190 | B cells | MARCKS |
| 5.65E-187 | 0.77419 | 0.772 | 0.594 | 1.13E-183 | B cells | SNX3 |
| 1.52E-181 | 1.821081 | 0.608 | 0.513 | 3.03E-178 | B cells | JCHAIN |
| 2.26E-178 | 0.798733 | 0.514 | 0.274 | 4.51E-175 | B cells | HHEX |
| 2.83E-156 | 0.760707 | 0.7 | 0.53 | 5.66E-153 | B cells | RPL22L1 |
| 1.01E-146 | 0.765905 | 0.528 | 0.377 | 2.01E-143 | B cells | DAPP1 |
| 1.35E-107 | 0.618077 | 0.791 | 0.666 | 2.71E-104 | B cells | ISG20 |
| 4.98E-104 | 0.610634 | 0.592 | 0.47 | 9.96E-101 | B cells | PARP1 |
| 3.93E-95 | 0.714807 | 0.72 | 0.573 | 7.85E-92 | B cells | JUN |
| 3.68E-21 | 0.776538 | 0.563 | 0.607 | 7.37E-18 | B cells | IGHA1 |
| 0 | 2.028433 | 0.909 | 0.001 | 0 | CMPs | ENSG00000289364 |
| 0 | 1.46648 | 0.955 | 0.001 | 0 | CMPs | GATA2 |
| 0 | 1.31111 | 0.773 | 0.005 | 0 | CMPs | MYCN |
| 0 | 1.198615 | 0.773 | 0 | 0 | CMPs | NPR3 |
| 0 | 1.169519 | 0.818 | 0.004 | 0 | CMPs | HTR1F |
| 0 | 0.995959 | 0.909 | 0 | 0 | CMPs | CRYGD |
| 3.70E-255 | 0.822555 | 0.682 | 0.002 | 7.40E-252 | CMPs | MYCT1 |
| 5.29E-255 | 0.703914 | 0.591 | 0.006 | 1.06E-251 | CMPs | CNRIP1 |
| 4.29E-147 | 1.396123 | 0.955 | 0.024 | 8.57E-144 | CMPs | CD34 |
| 7.50E-135 | 1.701907 | 0.818 | 0.001 | 1.50E-131 | CMPs | ENSG00000233968 |
| 3.76E-118 | 1.072974 | 0.818 | 0.018 | 7.52E-115 | CMPs | HPGDS |
| 3.45E-105 | 1.53658 | 0.909 | 0.027 | 6.89E-102 | CMPs | SMIM24 |
| 1.80E-103 | 0.794986 | 0.773 | 0.022 | 3.59E-100 | CMPs | CAVIN1 |
| 1.47E-100 | 0.815067 | 0.864 | 0.024 | 2.94E-97 | CMPs | EMID1 |
| 4.48E-96 | 0.908091 | 0.682 | 0.007 | 8.97E-93 | CMPs | TFPI |
| 6.25E-91 | 1.529672 | 0.773 | 0.007 | 1.25E-87 | CMPs | CRHBP |
| 3.91E-69 | 0.941861 | 0.727 | 0.001 | 7.82E-66 | CMPs | CDK6-AS1 |
| 1.25E-68 | 0.815101 | 0.591 | 0.001 | 2.50E-65 | CMPs | ZNF385D |
| 4.85E-68 | 0.968314 | 0.818 | 0.018 | 9.69E-65 | CMPs | ZNF521 |
| 6.57E-62 | 1.945058 | 0.955 | 0.033 | 1.31E-58 | CMPs | CYTL1 |
| 4.20E-60 | 0.648175 | 0.5 | 0.01 | 8.40E-57 | CMPs | ERG |
| 5.40E-58 | 0.895685 | 0.818 | 0.043 | 1.08E-54 | CMPs | BAALC |
| 2.91E-45 | 1.062378 | 0.773 | 0.024 | 5.83E-42 | CMPs | MSRB3 |
| 2.27E-41 | 0.781491 | 0.545 | 0.02 | 4.54E-38 | CMPs | DIPK1B |
| 4.74E-38 | 1.125374 | 0.727 | 0.025 | 9.49E-35 | CMPs | HOXA9 |
| 2.54E-35 | 1.104466 | 1 | 0.123 | 5.08E-32 | CMPs | NFE2 |
| 3.09E-34 | 1.437641 | 0.864 | 0.087 | 6.17E-31 | CMPs | FCER1A |
| 4.96E-29 | 0.585312 | 0.591 | 0.036 | 9.92E-26 | CMPs | SELENOP |
| 1.37E-28 | 1.980155 | 0.955 | 0.107 | 2.74E-25 | CMPs | PRSS57 |
| 4.31E-28 | 0.830057 | 0.727 | 0.056 | 8.62E-25 | CMPs | GUCY1A1 |
| 7.86E-28 | 1.564922 | 0.864 | 0.057 | 1.57E-24 | CMPs | IL1B |
| 2.53E-27 | 0.841835 | 0.727 | 0.055 | 5.06E-24 | CMPs | EGFL7 |
| 1.53E-26 | 0.759293 | 0.682 | 0.058 | 3.07E-23 | CMPs | KRT8 |
| 3.74E-26 | 1.272424 | 0.773 | 0.073 | 7.47E-23 | CMPs | EREG |
| 6.71E-24 | 1.202033 | 0.909 | 0.128 | 1.34E-20 | CMPs | MYB |
| 5.52E-23 | 1.589639 | 0.864 | 0.124 | 1.10E-19 | CMPs | FAM30A |
| 7.53E-20 | 3.275411 | 1 | 0.307 | 1.51E-16 | CMPs | SOX4 |
| 3.99E-19 | 0.714008 | 0.773 | 0.072 | 7.98E-16 | CMPs | HMGB3 |
| 1.87E-18 | 0.590384 | 0.727 | 0.091 | 3.74E-15 | CMPs | CTDSPL |
| 8.28E-18 | 2.730028 | 1 | 0.315 | 1.66E-14 | CMPs | GIHCG |
| 1.90E-17 | 2.832125 | 1 | 0.268 | 3.79E-14 | CMPs | CDK6 |
| 5.60E-17 | 1.053978 | 0.818 | 0.119 | 1.12E-13 | CMPs | ALDH1A1 |
| 1.07E-16 | 1.752951 | 1 | 0.266 | 2.14E-13 | CMPs | SLC40A1 |
| 1.14E-15 | 1.329925 | 0.773 | 0.158 | 2.28E-12 | CMPs | MDK |
| 8.48E-15 | 2.566323 | 1 | 0.592 | 1.70E-11 | CMPs | SERPINB1 |
| 1.37E-14 | 2.883131 | 0.864 | 0.216 | 2.74E-11 | CMPs | XACT |
| 1.38E-14 | 1.328748 | 0.864 | 0.204 | 2.76E-11 | CMPs | LMO2 |
| 2.49E-14 | 0.964796 | 0.955 | 0.269 | 4.99E-11 | CMPs | MPP1 |
| 5.01E-14 | 1.104867 | 0.909 | 0.254 | 1.00E-10 | CMPs | AKR1C3 |
| 1.84E-13 | 1.770172 | 0.909 | 0.268 | 3.68E-10 | CMPs | ANKRD28 |
| 1.09E-12 | 0.910199 | 0.727 | 0.133 | 2.19E-09 | CMPs | MGST1 |
| 1.29E-12 | 1.624443 | 0.955 | 0.473 | 2.57E-09 | CMPs | STMN1 |
| 1.96E-12 | 0.934379 | 0.864 | 0.27 | 3.91E-09 | CMPs | HPGD |
| 1.14E-11 | 1.527523 | 0.955 | 0.404 | 2.28E-08 | CMPs | CAT |
| 1.33E-11 | 1.703465 | 0.955 | 0.457 | 2.67E-08 | CMPs | MACROH2A1 |
| 1.55E-11 | 1.433905 | 1 | 0.546 | 3.10E-08 | CMPs | TXN |
| 2.09E-11 | 1.340354 | 0.773 | 0.133 | 4.18E-08 | CMPs | LAPTM4B |
| 3.72E-11 | 1.124072 | 0.864 | 0.267 | 7.44E-08 | CMPs | TSC22D1 |
| 4.62E-11 | 0.792392 | 0.591 | 0.057 | 9.24E-08 | CMPs | PBX1 |
| 5.56E-11 | 0.718713 | 0.864 | 0.161 | 1.11E-07 | CMPs | IGFBP7 |
| 1.23E-10 | 1.083842 | 0.864 | 0.217 | 2.46E-07 | CMPs | BCL11A |
| 2.51E-10 | 0.630373 | 0.682 | 0.184 | 5.02E-07 | CMPs | CLU |
| 2.65E-10 | 1.70353 | 0.727 | 0.24 | 5.30E-07 | CMPs | SPINK2 |
| 3.20E-10 | 1.032046 | 0.864 | 0.287 | 6.41E-07 | CMPs | LYL1 |
| 4.26E-10 | 0.810177 | 0.864 | 0.321 | 8.52E-07 | CMPs | CDK2AP1 |
| 4.79E-10 | 1.084824 | 0.909 | 0.357 | 9.57E-07 | CMPs | GNAQ |
| 5.91E-10 | 1.226802 | 1 | 0.471 | 1.18E-06 | CMPs | TKT |
| 8.62E-10 | 1.11666 | 0.682 | 0.13 | 1.72E-06 | CMPs | IL18 |
| 9.49E-10 | 1.347616 | 1 | 0.858 | 1.90E-06 | CMPs | GAPDH |
| 9.50E-10 | 0.917497 | 0.818 | 0.322 | 1.90E-06 | CMPs | FABP5 |
| 1.12E-09 | 0.599622 | 0.727 | 0.252 | 2.24E-06 | CMPs | PKIG |
| 1.31E-09 | 0.881628 | 0.909 | 0.305 | 2.61E-06 | CMPs | GLUL |
| 1.61E-09 | 0.966153 | 0.773 | 0.334 | 3.23E-06 | CMPs | CKS2 |
| 2.48E-09 | 1.451222 | 0.818 | 0.382 | 4.95E-06 | CMPs | KCNQ1OT1 |
| 2.82E-09 | 0.77815 | 0.636 | 0.117 | 5.63E-06 | CMPs | PCDH9 |
| 2.93E-09 | 0.909435 | 1 | 0.471 | 5.85E-06 | CMPs | AIF1 |
| 5.80E-09 | 0.924829 | 0.773 | 0.281 | 1.16E-05 | CMPs | PTMS |
| 7.27E-09 | 0.635382 | 0.909 | 0.366 | 1.45E-05 | CMPs | CCDC88A |
| 7.74E-09 | 0.728913 | 0.864 | 0.332 | 1.55E-05 | CMPs | CXXC5 |
| 1.04E-08 | 1.032924 | 0.909 | 0.37 | 2.09E-05 | CMPs | RNF130 |
| 1.43E-08 | 0.634082 | 0.5 | 0.072 | 2.85E-05 | CMPs | CASC15 |
| 2.06E-08 | 0.630907 | 0.591 | 0.144 | 4.11E-05 | CMPs | CSF2RB |
| 2.19E-08 | 1.059141 | 0.955 | 0.576 | 4.38E-05 | CMPs | TALDO1 |
| 2.31E-08 | 0.977615 | 0.773 | 0.231 | 4.63E-05 | CMPs | ETS2 |
| 3.11E-08 | 0.737338 | 1 | 0.583 | 6.21E-05 | CMPs | GPX1 |
| 1.07E-07 | 0.672961 | 0.955 | 0.433 | 0.00021481 | CMPs | LIMS1 |
| 1.62E-07 | 0.859653 | 0.955 | 0.557 | 0.00032371 | CMPs | OSTC |
| 1.82E-07 | 0.720874 | 0.636 | 0.181 | 0.00036455 | CMPs | HEMGN |
| 1.94E-07 | 0.657051 | 0.955 | 0.468 | 0.00038747 | CMPs | PPP1R14B |
| 2.95E-07 | 0.865665 | 0.864 | 0.443 | 0.00058919 | CMPs | MARCKSL1 |
| 5.75E-07 | 0.858056 | 0.682 | 0.193 | 0.00114916 | CMPs | MTURN |
| 6.06E-07 | 0.953992 | 0.818 | 0.389 | 0.00121167 | CMPs | MYADM |
| 6.09E-07 | 0.786086 | 1 | 0.928 | 0.00121709 | CMPs | HMGB1 |
| 6.39E-07 | 0.925831 | 0.864 | 0.369 | 0.00127868 | CMPs | YBX3 |
| 6.84E-07 | 0.866658 | 0.636 | 0.178 | 0.00136878 | CMPs | FHL1 |
| 7.23E-07 | 0.716647 | 1 | 0.562 | 0.00144616 | CMPs | H4C3 |
| 1.02E-06 | 0.62064 | 0.818 | 0.372 | 0.00204237 | CMPs | MLEC |
| 1.19E-06 | 0.673828 | 1 | 0.829 | 0.00238508 | CMPs | UQCRH |
| 1.87E-06 | 0.603273 | 0.955 | 0.481 | 0.00373951 | CMPs | PARP1 |
| 2.23E-06 | 0.797733 | 1 | 0.546 | 0.00446912 | CMPs | RPL22L1 |
| 2.82E-06 | 0.644368 | 0.909 | 0.416 | 0.00564548 | CMPs | MIS18BP1 |
| 4.24E-06 | 0.725539 | 0.682 | 0.245 | 0.00847302 | CMPs | MIR223HG |
| 4.52E-06 | 0.844125 | 0.909 | 0.427 | 0.00904779 | CMPs | SOD2 |
| 6.45E-06 | 0.970022 | 0.955 | 0.66 | 0.01290845 | CMPs | TAGLN2 |
| 3.14E-05 | 0.652746 | 1 | 0.667 | 0.06289457 | CMPs | SLC25A5 |
| 5.69E-05 | 0.862122 | 0.636 | 0.251 | 0.11387659 | CMPs | CREG1 |
| 6.07E-05 | 0.601322 | 0.591 | 0.166 | 0.1213966 | CMPs | SNCA |
| 7.82E-05 | 1.294586 | 0.682 | 0.359 | 0.15636695 | CMPs | LMO4 |
| 0.00014254 | 0.597407 | 0.864 | 0.517 | 0.2850895 | CMPs | TUBB |
| 0.00025413 | 0.628046 | 0.591 | 0.203 | 0.50825939 | CMPs | TCF4 |
| 0.00096837 | 0.74757 | 0.955 | 0.642 | 1 | CMPs | PRDX1 |
| 0.00188878 | 0.795649 | 0.955 | 0.705 | 1 | CMPs | ANXA1 |
| 0.0073406 | 0.734679 | 0.591 | 0.282 | 1 | CMPs | GPSM2 |
| 0.00750392 | 0.595184 | 1 | 0.898 | 1 | CMPs | VIM |

# Supplementary Data 1.3 marker genes of T subsets

| **marker genes of T subsets** | | | | | | |
| --- | --- | --- | --- | --- | --- | --- |
| p_val | avg_log2FC | pct.1 | pct.2 | p_val_adj | cluster | gene |
| 0 | 1.167981 | 0.923 | 0.576 | 0 | Th17 | S100A11 |
| 0 | 0.925519 | 0.994 | 0.878 | 0 | Th17 | LTB |
| 0 | 0.867975 | 0.748 | 0.402 | 0 | Th17 | GPR183 |
| 4.06E-275 | 0.743177 | 0.987 | 0.919 | 8.12E-272 | Th17 | VIM |
| 1.82E-263 | 0.952692 | 0.767 | 0.419 | 3.65E-260 | Th17 | ITGB1 |
| 4.49E-250 | 0.790144 | 0.97 | 0.826 | 8.98E-247 | Th17 | IL7R |
| 3.43E-244 | 0.840388 | 0.889 | 0.627 | 6.85E-241 | Th17 | ANXA1 |
| 3.68E-214 | 0.724503 | 0.801 | 0.518 | 7.37E-211 | Th17 | COTL1 |
| 1.63E-197 | 0.782402 | 0.789 | 0.505 | 3.27E-194 | Th17 | CRIP1 |
| 5.14E-172 | 0.607743 | 0.586 | 0.326 | 1.03E-168 | Th17 | GATA3 |
| 8.68E-172 | 0.631658 | 0.59 | 0.31 | 1.74E-168 | Th17 | LIMS1 |
| 2.87E-128 | 0.659029 | 0.606 | 0.375 | 5.74E-125 | Th17 | AQP3 |
| 3.66E-217 | 0.741114 | 0.783 | 0.624 | 7.33E-214 | Th1 | PRKCQ-AS1 |
| 6.97E-157 | 0.714889 | 0.504 | 0.302 | 1.39E-153 | Th1 | TSHZ2 |
| 3.27E-107 | 0.596179 | 0.649 | 0.517 | 6.53E-104 | Th1 | MAL |
| 0 | 2.250818 | 0.835 | 0.378 | 0 | CD8_naive | LINC02446 |
| 0 | 1.742461 | 0.924 | 0.482 | 0 | CD8_naive | CD8B |
| 2.30E-235 | 1.034649 | 0.706 | 0.394 | 4.61E-232 | CD8_naive | AIF1 |
| 1.15E-229 | 0.761342 | 0.748 | 0.416 | 2.29E-226 | CD8_naive | CD8A |
| 9.11E-76 | 0.619451 | 0.512 | 0.4 | 1.82E-72 | CD8_naive | LRRN3 |
| 0 | 2.459212 | 0.99 | 0.421 | 0 | CD8_effector | CCL5 |
| 0 | 2.399601 | 0.96 | 0.335 | 0 | CD8_effector | NKG7 |
| 0 | 2.187309 | 0.775 | 0.24 | 0 | CD8_effector | GZMH |
| 0 | 2.094681 | 0.919 | 0.322 | 0 | CD8_effector | GZMA |
| 0 | 1.821976 | 0.923 | 0.337 | 0 | CD8_effector | CST7 |
| 0 | 1.684058 | 0.768 | 0.342 | 0 | CD8_effector | TRGC2 |
| 0 | 1.59221 | 0.796 | 0.233 | 0 | CD8_effector | KLRD1 |
| 0 | 1.4962 | 0.78 | 0.303 | 0 | CD8_effector | PLEK |
| 0 | 1.480026 | 0.77 | 0.227 | 0 | CD8_effector | HOPX |
| 0 | 1.417686 | 0.793 | 0.266 | 0 | CD8_effector | KLRG1 |
| 0 | 1.399495 | 0.768 | 0.292 | 0 | CD8_effector | PRF1 |
| 0 | 1.3881 | 0.982 | 0.82 | 0 | CD8_effector | S100A4 |
| 0 | 1.288851 | 0.709 | 0.241 | 0 | CD8_effector | CCL4 |
| 0 | 1.282638 | 0.811 | 0.378 | 0 | CD8_effector | CTSW |
| 0 | 1.244945 | 0.67 | 0.216 | 0 | CD8_effector | ZEB2 |
| 0 | 1.238045 | 0.767 | 0.364 | 0 | CD8_effector | LYAR |
| 0 | 1.196325 | 0.781 | 0.385 | 0 | CD8_effector | C12orf75 |
| 0 | 1.186292 | 0.854 | 0.518 | 0 | CD8_effector | HLA-DPB1 |
| 0 | 1.1842 | 0.779 | 0.4 | 0 | CD8_effector | CD8A |
| 0 | 1.03721 | 0.692 | 0.241 | 0 | CD8_effector | FCGR3A |
| 0 | 0.836638 | 0.992 | 0.924 | 0 | CD8_effector | IL32 |
| 0 | 0.700031 | 0.543 | 0.098 | 0 | CD8_effector | ENSG00000289137 |
| 0 | 0.676959 | 0.519 | 0.097 | 0 | CD8_effector | ZNF683 |
| 2.12E-292 | 1.287802 | 0.72 | 0.307 | 4.24E-289 | CD8_effector | EFHD2 |
| 1.04E-281 | 1.191354 | 0.762 | 0.372 | 2.07E-278 | CD8_effector | LINC01871 |
| 1.80E-273 | 1.152139 | 0.705 | 0.339 | 3.61E-270 | CD8_effector | HLA-DRB1 |
| 9.75E-273 | 1.067434 | 0.749 | 0.408 | 1.95E-269 | CD8_effector | HLA-DPA1 |
| 2.34E-271 | 1.737866 | 0.648 | 0.221 | 4.68E-268 | CD8_effector | GZMB |
| 5.34E-267 | 0.603947 | 0.54 | 0.126 | 1.07E-263 | CD8_effector | XCL2 |
| 1.93E-248 | 0.823207 | 0.981 | 0.939 | 3.87E-245 | CD8_effector | S100A6 |
| 1.39E-238 | 2.199945 | 0.638 | 0.22 | 2.78E-235 | CD8_effector | FGFBP2 |
| 2.29E-234 | 2.599396 | 0.677 | 0.328 | 4.59E-231 | CD8_effector | GNLY |
| 1.00E-233 | 0.925556 | 0.79 | 0.495 | 2.01E-230 | CD8_effector | CD8B |
| 1.10E-232 | 0.895261 | 0.866 | 0.612 | 2.20E-229 | CD8_effector | SRGN |
| 1.81E-232 | 0.795876 | 0.968 | 0.836 | 3.62E-229 | CD8_effector | S100A10 |
| 3.43E-215 | 0.94409 | 0.793 | 0.493 | 6.86E-212 | CD8_effector | CD74 |
| 2.75E-213 | 0.862806 | 0.895 | 0.64 | 5.50E-210 | CD8_effector | ANXA1 |
| 1.38E-208 | 0.590508 | 0.528 | 0.157 | 2.76E-205 | CD8_effector | SLAMF7 |
| 6.51E-206 | 0.905146 | 0.551 | 0.201 | 1.30E-202 | CD8_effector | SPON2 |
| 2.92E-201 | 0.678654 | 0.693 | 0.347 | 5.83E-198 | CD8_effector | ANXA2 |
| 8.69E-193 | 0.827908 | 0.532 | 0.121 | 1.74E-189 | CD8_effector | FCRL6 |
| 1.71E-188 | 0.694964 | 0.53 | 0.162 | 3.42E-185 | CD8_effector | ADGRG1 |
| 6.52E-188 | 1.466991 | 0.702 | 0.4 | 1.30E-184 | CD8_effector | LGALS1 |
| 4.93E-183 | 0.795923 | 0.789 | 0.46 | 9.86E-180 | CD8_effector | AHNAK |
| 9.87E-160 | 0.745113 | 0.79 | 0.558 | 1.97E-156 | CD8_effector | GSTP1 |
| 9.67E-154 | 1.865813 | 0.567 | 0.223 | 1.93E-150 | CD8_effector | GZMK |
| 5.71E-147 | 0.586769 | 0.95 | 0.854 | 1.14E-143 | CD8_effector | UBB |
| 4.77E-142 | 0.732082 | 0.858 | 0.701 | 9.54E-139 | CD8_effector | LCP1 |
| 1.17E-140 | 0.744499 | 0.559 | 0.248 | 2.35E-137 | CD8_effector | MYBL1 |
| 1.90E-133 | 0.908993 | 0.704 | 0.459 | 3.79E-130 | CD8_effector | ID2 |
| 1.15E-132 | 0.890656 | 0.525 | 0.181 | 2.29E-129 | CD8_effector | CX3CR1 |
| 3.47E-124 | 0.757598 | 0.567 | 0.268 | 6.94E-121 | CD8_effector | MYO1F |
| 1.02E-114 | 0.632985 | 0.54 | 0.271 | 2.04E-111 | CD8_effector | LAIR2 |
| 3.75E-98 | 0.613369 | 0.744 | 0.509 | 7.49E-95 | CD8_effector | KLF6 |
| 3.67E-78 | 0.600943 | 0.74 | 0.57 | 7.33E-75 | CD8_effector | CALR |
| 1.07E-74 | 0.637362 | 0.632 | 0.415 | 2.14E-71 | CD8_effector | IRF1 |
| 5.73E-73 | 0.740721 | 0.659 | 0.46 | 1.15E-69 | CD8_effector | ITGB1 |
| 5.18E-68 | 1.336319 | 0.545 | 0.339 | 1.04E-64 | CD8_effector | CMC1 |
| 0 | 2.788652 | 1 | 0.405 | 0 | CD8_memory | NKG7 |
| 0 | 2.588963 | 0.988 | 0.29 | 0 | CD8_memory | GZMH |
| 0 | 2.344693 | 1 | 0.486 | 0 | CD8_memory | CCL5 |
| 0 | 2.31862 | 0.988 | 0.401 | 0 | CD8_memory | CST7 |
| 0 | 2.091451 | 0.89 | 0.282 | 0 | CD8_memory | FCGR3A |
| 2.34E-291 | 1.976197 | 0.988 | 0.387 | 4.67E-288 | CD8_memory | GZMA |
| 9.36E-285 | 1.560314 | 0.775 | 0.206 | 1.87E-281 | CD8_memory | CX3CR1 |
| 1.13E-278 | 2.179193 | 0.885 | 0.257 | 2.26E-275 | CD8_memory | GZMB |
| 2.23E-278 | 2.247505 | 0.899 | 0.342 | 4.45E-275 | CD8_memory | CMC1 |
| 2.94E-270 | 1.908942 | 0.915 | 0.339 | 5.87E-267 | CD8_memory | PRF1 |
| 2.07E-260 | 2.001735 | 0.874 | 0.294 | 4.14E-257 | CD8_memory | KLRD1 |
| 4.18E-247 | 1.136037 | 0.659 | 0.166 | 8.36E-244 | CD8_memory | XCL2 |
| 3.60E-238 | 1.819449 | 0.826 | 0.289 | 7.21E-235 | CD8_memory | CCL4 |
| 2.89E-236 | 1.950807 | 0.863 | 0.385 | 5.79E-233 | CD8_memory | TRGC2 |
| 1.21E-233 | 1.791271 | 0.817 | 0.26 | 2.43E-230 | CD8_memory | ZEB2 |
| 7.56E-224 | 1.57616 | 0.856 | 0.354 | 1.51E-220 | CD8_memory | PLEK |
| 2.29E-219 | 1.628539 | 0.862 | 0.346 | 4.58E-216 | CD8_memory | EFHD2 |
| 6.11E-219 | 1.206893 | 0.673 | 0.198 | 1.22E-215 | CD8_memory | CCL3L3 |
| 3.73E-210 | 1.361639 | 0.948 | 0.636 | 7.46E-207 | CD8_memory | SRGN |
| 1.33E-209 | 1.801363 | 0.81 | 0.259 | 2.67E-206 | CD8_memory | FGFBP2 |
| 4.38E-209 | 1.787623 | 0.722 | 0.222 | 8.77E-206 | CD8_memory | KLRF1 |
| 5.18E-171 | 1.342272 | 0.833 | 0.428 | 1.04E-167 | CD8_memory | C12orf75 |
| 1.36E-159 | 2.308491 | 0.795 | 0.362 | 2.71E-156 | CD8_memory | GNLY |
| 8.57E-156 | 1.33065 | 0.644 | 0.198 | 1.71E-152 | CD8_memory | ADGRG1 |
| 5.40E-154 | 1.241743 | 0.702 | 0.319 | 1.08E-150 | CD8_memory | TIGIT |
| 1.04E-152 | 1.039399 | 0.999 | 0.838 | 2.07E-149 | CD8_memory | S100A4 |
| 2.25E-149 | 1.515975 | 0.688 | 0.294 | 4.50E-146 | CD8_memory | LAIR2 |
| 5.54E-141 | 1.261393 | 0.737 | 0.292 | 1.11E-137 | CD8_memory | HOPX |
| 1.64E-140 | 0.868645 | 0.979 | 0.933 | 3.28E-137 | CD8_memory | IL32 |
| 3.74E-133 | 1.17544 | 0.74 | 0.33 | 7.48E-130 | CD8_memory | KLRG1 |
| 4.04E-130 | 1.286815 | 0.807 | 0.428 | 8.09E-127 | CD8_memory | CTSW |
| 1.24E-126 | 1.143486 | 0.628 | 0.282 | 2.47E-123 | CD8_memory | IKZF2 |
| 6.94E-115 | 1.083648 | 0.772 | 0.416 | 1.39E-111 | CD8_memory | LINC01871 |
| 1.80E-113 | 1.074589 | 0.72 | 0.381 | 3.59E-110 | CD8_memory | HLA-DRB1 |
| 1.49E-110 | 1.29078 | 0.624 | 0.278 | 2.99E-107 | CD8_memory | CLIC3 |
| 3.48E-110 | 0.744074 | 1 | 0.994 | 6.97E-107 | CD8_memory | ACTB |
| 4.02E-109 | 1.012472 | 0.815 | 0.559 | 8.04E-106 | CD8_memory | HLA-DPB1 |
| 9.58E-109 | 0.697303 | 0.994 | 0.943 | 1.92E-105 | CD8_memory | S100A6 |
| 1.18E-107 | 1.222546 | 0.921 | 0.698 | 2.36E-104 | CD8_memory | TRBC1 |
| 2.41E-97 | 0.884002 | 0.897 | 0.717 | 4.83E-94 | CD8_memory | LCP1 |
| 1.43E-96 | 1.139601 | 0.555 | 0.167 | 2.87E-93 | CD8_memory | FCRL6 |
| 3.07E-95 | 0.852234 | 0.759 | 0.411 | 6.13E-92 | CD8_memory | LYAR |
| 8.85E-95 | 0.890654 | 0.708 | 0.386 | 1.77E-91 | CD8_memory | ANXA2 |
| 1.75E-84 | 0.711769 | 0.939 | 0.866 | 3.50E-81 | CD8_memory | UBB |
| 1.89E-84 | 0.981914 | 0.624 | 0.313 | 3.78E-81 | CD8_memory | CYTOR |
| 1.99E-81 | 1.426337 | 0.531 | 0.228 | 3.98E-78 | CD8_memory | TYROBP |
| 1.64E-80 | 1.001522 | 0.707 | 0.448 | 3.27E-77 | CD8_memory | CD8A |
| 1.48E-76 | 0.799679 | 0.525 | 0.248 | 2.96E-73 | CD8_memory | RHOC |
| 3.20E-73 | 0.587146 | 0.969 | 0.923 | 6.40E-70 | CD8_memory | OAZ1 |
| 5.38E-71 | 1.112845 | 0.56 | 0.295 | 1.08E-67 | CD8_memory | CEP78 |
| 5.42E-69 | 0.857469 | 0.76 | 0.586 | 1.08E-65 | CD8_memory | GSTP1 |
| 2.97E-67 | 0.622905 | 0.929 | 0.839 | 5.95E-64 | CD8_memory | GAPDH |
| 4.02E-64 | 0.827956 | 0.811 | 0.631 | 8.04E-61 | CD8_memory | XIST |
| 5.75E-62 | 0.814993 | 0.558 | 0.284 | 1.15E-58 | CD8_memory | MYBL1 |
| 1.43E-61 | 0.939629 | 0.577 | 0.302 | 2.85E-58 | CD8_memory | MYO1F |
| 1.44E-58 | 0.912432 | 0.695 | 0.435 | 2.88E-55 | CD8_memory | LGALS1 |
| 1.90E-55 | 0.786928 | 0.668 | 0.452 | 3.81E-52 | CD8_memory | HLA-DPA1 |
| 4.35E-53 | 0.593837 | 0.728 | 0.532 | 8.70E-50 | CD8_memory | CD74 |
| 1.41E-52 | 0.73867 | 0.744 | 0.597 | 2.83E-49 | CD8_memory | PRELID1 |
| 2.55E-52 | 0.589811 | 0.762 | 0.5 | 5.09E-49 | CD8_memory | AHNAK |
| 1.79E-48 | 0.663622 | 0.714 | 0.534 | 3.58E-45 | CD8_memory | CD8B |
| 6.97E-44 | 0.653205 | 0.574 | 0.33 | 1.39E-40 | CD8_memory | KLRB1 |
| 1.35E-38 | 0.722138 | 0.662 | 0.49 | 2.69E-35 | CD8_memory | ID2 |
| 1.32E-35 | 0.681488 | 0.71 | 0.591 | 2.64E-32 | CD8_memory | CALR |
| 3.49E-35 | 0.651084 | 0.615 | 0.441 | 6.97E-32 | CD8_memory | IRF1 |
| 2.23E-31 | 0.735828 | 0.507 | 0.36 | 4.45E-28 | CD8_memory | NCR3 |
| 1.45E-143 | 1.880401 | 0.71 | 0.252 | 2.89E-140 | Treg | GZMK |
| 1.64E-104 | 0.811453 | 0.978 | 0.838 | 3.27E-101 | Treg | S100A4 |
| 3.48E-98 | 2.455468 | 0.668 | 0.323 | 6.97E-95 | Treg | KLRB1 |
| 3.85E-93 | 0.735064 | 0.985 | 0.932 | 7.70E-90 | Treg | IL32 |
| 1.23E-84 | 0.734656 | 0.787 | 0.397 | 2.46E-81 | Treg | GZMA |
| 1.27E-66 | 1.039439 | 0.616 | 0.352 | 2.54E-63 | Treg | NCR3 |
| 3.36E-63 | 0.680487 | 0.565 | 0.285 | 6.72E-60 | Treg | IKZF2 |
| 7.20E-61 | 0.948039 | 0.644 | 0.334 | 1.44E-57 | Treg | KLRG1 |
| 2.42E-57 | 0.949211 | 0.679 | 0.414 | 4.84E-54 | Treg | LYAR |
| 4.03E-51 | 0.710125 | 0.585 | 0.293 | 8.07E-48 | Treg | DUSP1 |
| 2.66E-48 | 0.62047 | 0.871 | 0.698 | 5.33E-45 | Treg | IER2 |
| 9.38E-41 | 0.610357 | 0.787 | 0.601 | 1.88E-37 | Treg | JUNB |
| 7.74E-40 | 0.636532 | 0.543 | 0.328 | 1.55E-36 | Treg | TIGIT |
| 1.53E-28 | 0.598673 | 0.743 | 0.566 | 3.06E-25 | Treg | JUN |
| 3.22E-54 | 1.989639 | 0.915 | 0.769 | 6.43E-51 | CD4_naive | NEAT1 |
| 2.75E-35 | 0.691116 | 0.592 | 0.212 | 5.50E-32 | CD4_naive | SLAMF7 |
| 1.68E-30 | 0.65805 | 0.567 | 0.313 | 3.35E-27 | CD4_naive | ENSG00000274422 |
| 2.23E-30 | 1.134996 | 0.572 | 0.26 | 4.46E-27 | CD4_naive | ANKRD28 |
| 4.04E-29 | 1.737994 | 0.512 | 0.212 | 8.08E-26 | CD4_naive | IGHG2 |
| 2.36E-27 | 1.085546 | 0.552 | 0.239 | 4.71E-24 | CD4_naive | TP53INP1 |
| 3.94E-24 | 3.191704 | 0.577 | 0.374 | 7.87E-21 | CD4_naive | IGHA2 |
| 9.08E-23 | 1.251975 | 0.612 | 0.313 | 1.82E-19 | CD4_naive | RNF149 |
| 2.77E-20 | 0.677932 | 0.562 | 0.296 | 5.53E-17 | CD4_naive | SLC2A3 |
| 2.17E-18 | 4.907175 | 0.701 | 0.552 | 4.35E-15 | CD4_naive | IGHA1 |
| 5.00E-17 | 1.214792 | 0.761 | 0.51 | 9.99E-14 | CD4_naive | AHNAK |
| 4.69E-13 | 4.77898 | 0.622 | 0.506 | 9.38E-10 | CD4_naive | IGLC2 |
| 2.69E-12 | 2.046818 | 0.761 | 0.639 | 5.39E-09 | CD4_naive | XIST |
| 4.85E-12 | 0.930955 | 0.532 | 0.339 | 9.70E-09 | CD4_naive | PARP14 |
| 3.03E-11 | 4.041246 | 0.627 | 0.456 | 6.07E-08 | CD4_naive | JCHAIN |
| 3.76E-07 | 1.333451 | 0.726 | 0.633 | 0.000751688 | CD4_naive | ENSG00000289474 |
| 4.03E-07 | 0.586936 | 0.507 | 0.388 | 0.000806924 | CD4_naive | KCNQ1OT1 |
| 4.58E-06 | 0.890231 | 0.597 | 0.473 | 0.009152084 | CD4_naive | MCL1 |
| 0.00013634 | 0.916868 | 0.632 | 0.587 | 0.272677201 | CD4_naive | SAMHD1 |
| 0.0001716 | 0.580525 | 0.602 | 0.478 | 0.34319925 | CD4_naive | SPCS3 |
| 0.00085126 | 0.755574 | 0.488 | 0.654 | 1 | CD4_naive | HSP90B1 |
| 0.00112821 | 0.643611 | 0.552 | 0.431 | 1 | CD4_naive | TUBB4B |
| 4.18E-74 | 3.810378 | 0.75 | 0.177 | 8.35E-71 | TFH | CAVIN2 |
| 1.69E-65 | 2.2146 | 0.574 | 0.046 | 3.39E-62 | TFH | SPARC |
| 3.99E-63 | 4.101429 | 0.801 | 0.258 | 7.97E-60 | TFH | NRGN |
| 5.37E-49 | 5.454643 | 0.75 | 0.215 | 1.07E-45 | TFH | PPBP |
| 7.76E-46 | 3.543536 | 0.574 | 0.105 | 1.55E-42 | TFH | TUBB1 |
| 8.26E-30 | 2.32627 | 0.603 | 0.157 | 1.65E-26 | TFH | CLU |
| 8.38E-30 | 2.292837 | 0.89 | 0.606 | 1.68E-26 | TFH | TAGLN2 |
| 2.99E-29 | 3.27463 | 0.706 | 0.333 | 5.99E-26 | TFH | H2AC6 |
| 3.89E-29 | 1.779855 | 1 | 0.972 | 7.77E-26 | TFH | FTH1 |
| 1.63E-28 | 3.926057 | 0.581 | 0.162 | 3.25E-25 | TFH | GNG11 |
| 1.64E-25 | 1.303766 | 0.985 | 0.917 | 3.29E-22 | TFH | HMGB1 |
| 2.32E-23 | 2.549833 | 0.706 | 0.364 | 4.65E-20 | TFH | NCOA4 |
| 7.31E-23 | 1.698068 | 0.949 | 0.925 | 1.46E-19 | TFH | OAZ1 |
| 4.81E-21 | 3.358842 | 0.765 | 0.5 | 9.62E-18 | TFH | GPX1 |
| 4.04E-19 | 1.521606 | 0.713 | 0.403 | 8.08E-16 | TFH | TPM4 |
| 9.29E-18 | 2.442065 | 0.706 | 0.366 | 1.86E-14 | TFH | LIMS1 |
| 3.23E-17 | 1.341673 | 0.838 | 0.511 | 6.46E-14 | TFH | CCL5 |
| 6.10E-17 | 1.471014 | 0.618 | 0.288 | 1.22E-13 | TFH | GZMB |
| 7.96E-17 | 0.949117 | 0.993 | 0.994 | 1.59E-13 | TFH | ACTB |
| 1.48E-16 | 1.20497 | 0.618 | 0.291 | 2.95E-13 | TFH | TRDC |
| 4.45E-15 | 3.468534 | 0.507 | 0.165 | 8.91E-12 | TFH | RGS18 |
| 8.88E-15 | 0.773542 | 0.647 | 0.327 | 1.78E-11 | TFH | CYTOR |
| 1.03E-14 | 0.715807 | 0.551 | 0.236 | 2.05E-11 | TFH | STXBP2 |
| 1.09E-13 | 1.115222 | 0.669 | 0.379 | 2.17E-10 | TFH | PLEK |
| 9.69E-13 | 0.589718 | 0.662 | 0.382 | 1.94E-09 | TFH | CTSD |
| 1.42E-12 | 1.755849 | 0.507 | 0.215 | 2.83E-09 | TFH | PDLIM1 |
| 1.56E-12 | 0.897221 | 0.721 | 0.418 | 3.13E-09 | TFH | GZMA |
| 2.22E-12 | 2.409391 | 0.522 | 0.236 | 4.45E-09 | TFH | MAP3K7CL |
| 7.36E-12 | 1.305678 | 0.603 | 0.315 | 1.47E-08 | TFH | CCL4 |
| 1.37E-11 | 0.811354 | 0.559 | 0.294 | 2.73E-08 | TFH | CLIC3 |
| 1.95E-11 | 0.810078 | 0.794 | 0.652 | 3.90E-08 | TFH | SRGN |
| 2.25E-11 | 1.732836 | 0.522 | 0.21 | 4.50E-08 | TFH | FCER1G |
| 6.44E-11 | 2.398062 | 0.522 | 0.239 | 1.29E-07 | TFH | MMD |
| 2.31E-10 | 1.849584 | 0.544 | 0.3 | 4.62E-07 | TFH | PGRMC1 |
| 2.44E-10 | 0.711116 | 0.515 | 0.235 | 4.87E-07 | TFH | CX3CR1 |
| 3.26E-10 | 1.452551 | 0.61 | 0.369 | 6.53E-07 | TFH | SOD2 |
| 4.62E-10 | 2.721494 | 0.522 | 0.274 | 9.23E-07 | TFH | TSC22D1 |
| 4.89E-10 | 1.333119 | 0.603 | 0.352 | 9.79E-07 | TFH | ASAH1 |
| 7.89E-10 | 1.484595 | 0.728 | 0.516 | 1.58E-06 | TFH | TUBB |
| 9.36E-10 | 1.392402 | 0.897 | 0.814 | 1.87E-06 | TFH | NAP1L1 |
| 1.80E-09 | 2.318957 | 0.699 | 0.48 | 3.61E-06 | TFH | STMN1 |
| 4.02E-09 | 0.726232 | 0.684 | 0.448 | 8.04E-06 | TFH | C12orf75 |
| 5.52E-09 | 1.208328 | 0.721 | 0.505 | 1.10E-05 | TFH | SAT1 |
| 7.93E-09 | 0.621619 | 0.588 | 0.328 | 1.59E-05 | TFH | IL2RB |
| 9.14E-09 | 1.743671 | 0.559 | 0.335 | 1.83E-05 | TFH | VCL |
| 1.04E-08 | 1.554592 | 0.507 | 0.242 | 2.09E-05 | TFH | TYROBP |
| 1.12E-08 | 0.82176 | 0.559 | 0.286 | 2.24E-05 | TFH | FGFBP2 |
| 1.13E-08 | 0.59482 | 0.574 | 0.313 | 2.26E-05 | TFH | ATP6V0D1 |
| 2.10E-08 | 1.540204 | 0.529 | 0.303 | 4.21E-05 | TFH | DAPP1 |
| 2.32E-08 | 0.81036 | 0.574 | 0.314 | 4.65E-05 | TFH | SMC4 |
| 2.39E-08 | 1.065415 | 0.618 | 0.399 | 4.78E-05 | TFH | PLEKHO1 |
| 6.03E-08 | 0.793212 | 0.691 | 0.49 | 0.000120619 | TFH | ITGB1 |
| 1.53E-07 | 1.789865 | 0.574 | 0.384 | 0.000306991 | TFH | GNLY |
| 2.00E-07 | 0.699816 | 0.757 | 0.594 | 0.000400474 | TFH | GSTP1 |
| 2.88E-07 | 0.804593 | 0.699 | 0.513 | 0.000575903 | TFH | SERPINB1 |
| 3.15E-07 | 0.686785 | 0.985 | 0.961 | 0.000629553 | TFH | ACTG1 |
| 8.15E-07 | 0.933897 | 0.86 | 0.844 | 0.001630911 | TFH | GAPDH |
| 1.20E-06 | 0.802384 | 0.522 | 0.289 | 0.002403108 | TFH | ZEB2 |
| 1.59E-06 | 1.942445 | 0.75 | 0.648 | 0.003180913 | TFH | TUBA1B |
| 1.97E-06 | 0.978782 | 0.691 | 0.49 | 0.003948011 | TFH | DUT |
| 5.94E-06 | 0.601117 | 0.89 | 0.87 | 0.011873147 | TFH | UBB |
| 7.64E-06 | 0.80488 | 0.676 | 0.507 | 0.015288626 | TFH | TALDO1 |
| 1.14E-05 | 1.778841 | 0.632 | 0.486 | 0.022812496 | TFH | HMGB2 |
| 1.55E-05 | 1.161496 | 0.794 | 0.717 | 0.030978058 | TFH | HMGN2 |
| 1.61E-05 | 2.21149 | 0.559 | 0.377 | 0.032117871 | TFH | NT5C3A |
| 1.97E-05 | 1.053567 | 0.574 | 0.414 | 0.039455279 | TFH | TIMP1 |
| 3.96E-05 | 1.123439 | 0.596 | 0.436 | 0.079292341 | TFH | NKG7 |
| 7.23E-05 | 0.924893 | 0.64 | 0.447 | 0.144667705 | TFH | LGALS1 |
| 8.39E-05 | 0.981384 | 0.537 | 0.373 | 0.167837109 | TFH | EFHD2 |
| 0.00015179 | 0.943367 | 0.574 | 0.431 | 0.303578451 | TFH | TUBB4B |
| 0.00016116 | 0.734916 | 0.581 | 0.402 | 0.322313465 | TFH | ANXA2 |
| 0.00022441 | 0.949823 | 0.537 | 0.344 | 0.448828253 | TFH | PCNA |
| 0.00023738 | 0.623291 | 0.838 | 0.819 | 0.474753664 | TFH | UQCRH |
| 0.00027506 | 1.058616 | 0.787 | 0.745 | 0.550124148 | TFH | H2AZ1 |
| 0.00550332 | 0.753401 | 0.544 | 0.448 | 1 | TFH | CTSW |
| 7.60E-78 | 2.604924 | 0.587 | 0.003 | 1.52E-74 | Th2 | AHSP |
| 1.26E-46 | 2.077473 | 0.63 | 0.002 | 2.52E-43 | Th2 | ALAS2 |
| 1.70E-43 | 2.019217 | 0.761 | 0.084 | 3.39E-40 | Th2 | SNCA |
| 1.29E-38 | 6.862043 | 1 | 0.058 | 2.58E-35 | Th2 | HBA1 |
| 1.81E-38 | 7.358842 | 1 | 0.112 | 3.62E-35 | Th2 | HBA2 |
| 2.13E-38 | 9.042775 | 1 | 0.203 | 4.26E-35 | Th2 | HBB |
| 1.11E-30 | 1.839003 | 0.543 | 0.001 | 2.22E-27 | Th2 | CA1 |
| 2.48E-21 | 2.227638 | 0.913 | 0.29 | 4.96E-18 | Th2 | SLC25A37 |
| 9.04E-12 | 1.246369 | 0.804 | 0.25 | 1.81E-08 | Th2 | YBX3 |
| 5.49E-09 | 0.810613 | 0.739 | 0.218 | 1.10E-05 | Th2 | TESC |
| 1.26E-05 | 0.900955 | 0.913 | 0.87 | 0.0251193 | Th2 | UBB |
| 0.00031048 | 0.981028 | 0.717 | 0.294 | 0.62096448 | Th2 | EIF1AY |
| 0.00096092 | 1.463308 | 0.63 | 0.289 | 1 | Th2 | BLVRB |
| 0.00235729 | 1.275911 | 0.609 | 0.231 | 1 | Th2 | LGALS3 |
| 0.00584789 | 1.167555 | 0.652 | 0.383 | 1 | Th2 | BNIP3L |
| 0.00744308 | 0.642851 | 0.696 | 0.274 | 1 | Th2 | MYOM2 |

# Supplementary Figure1. A and B. UMAP of 20 clusters by unsupervised cluster algorithm which were indicated as 0-19 in different colors.


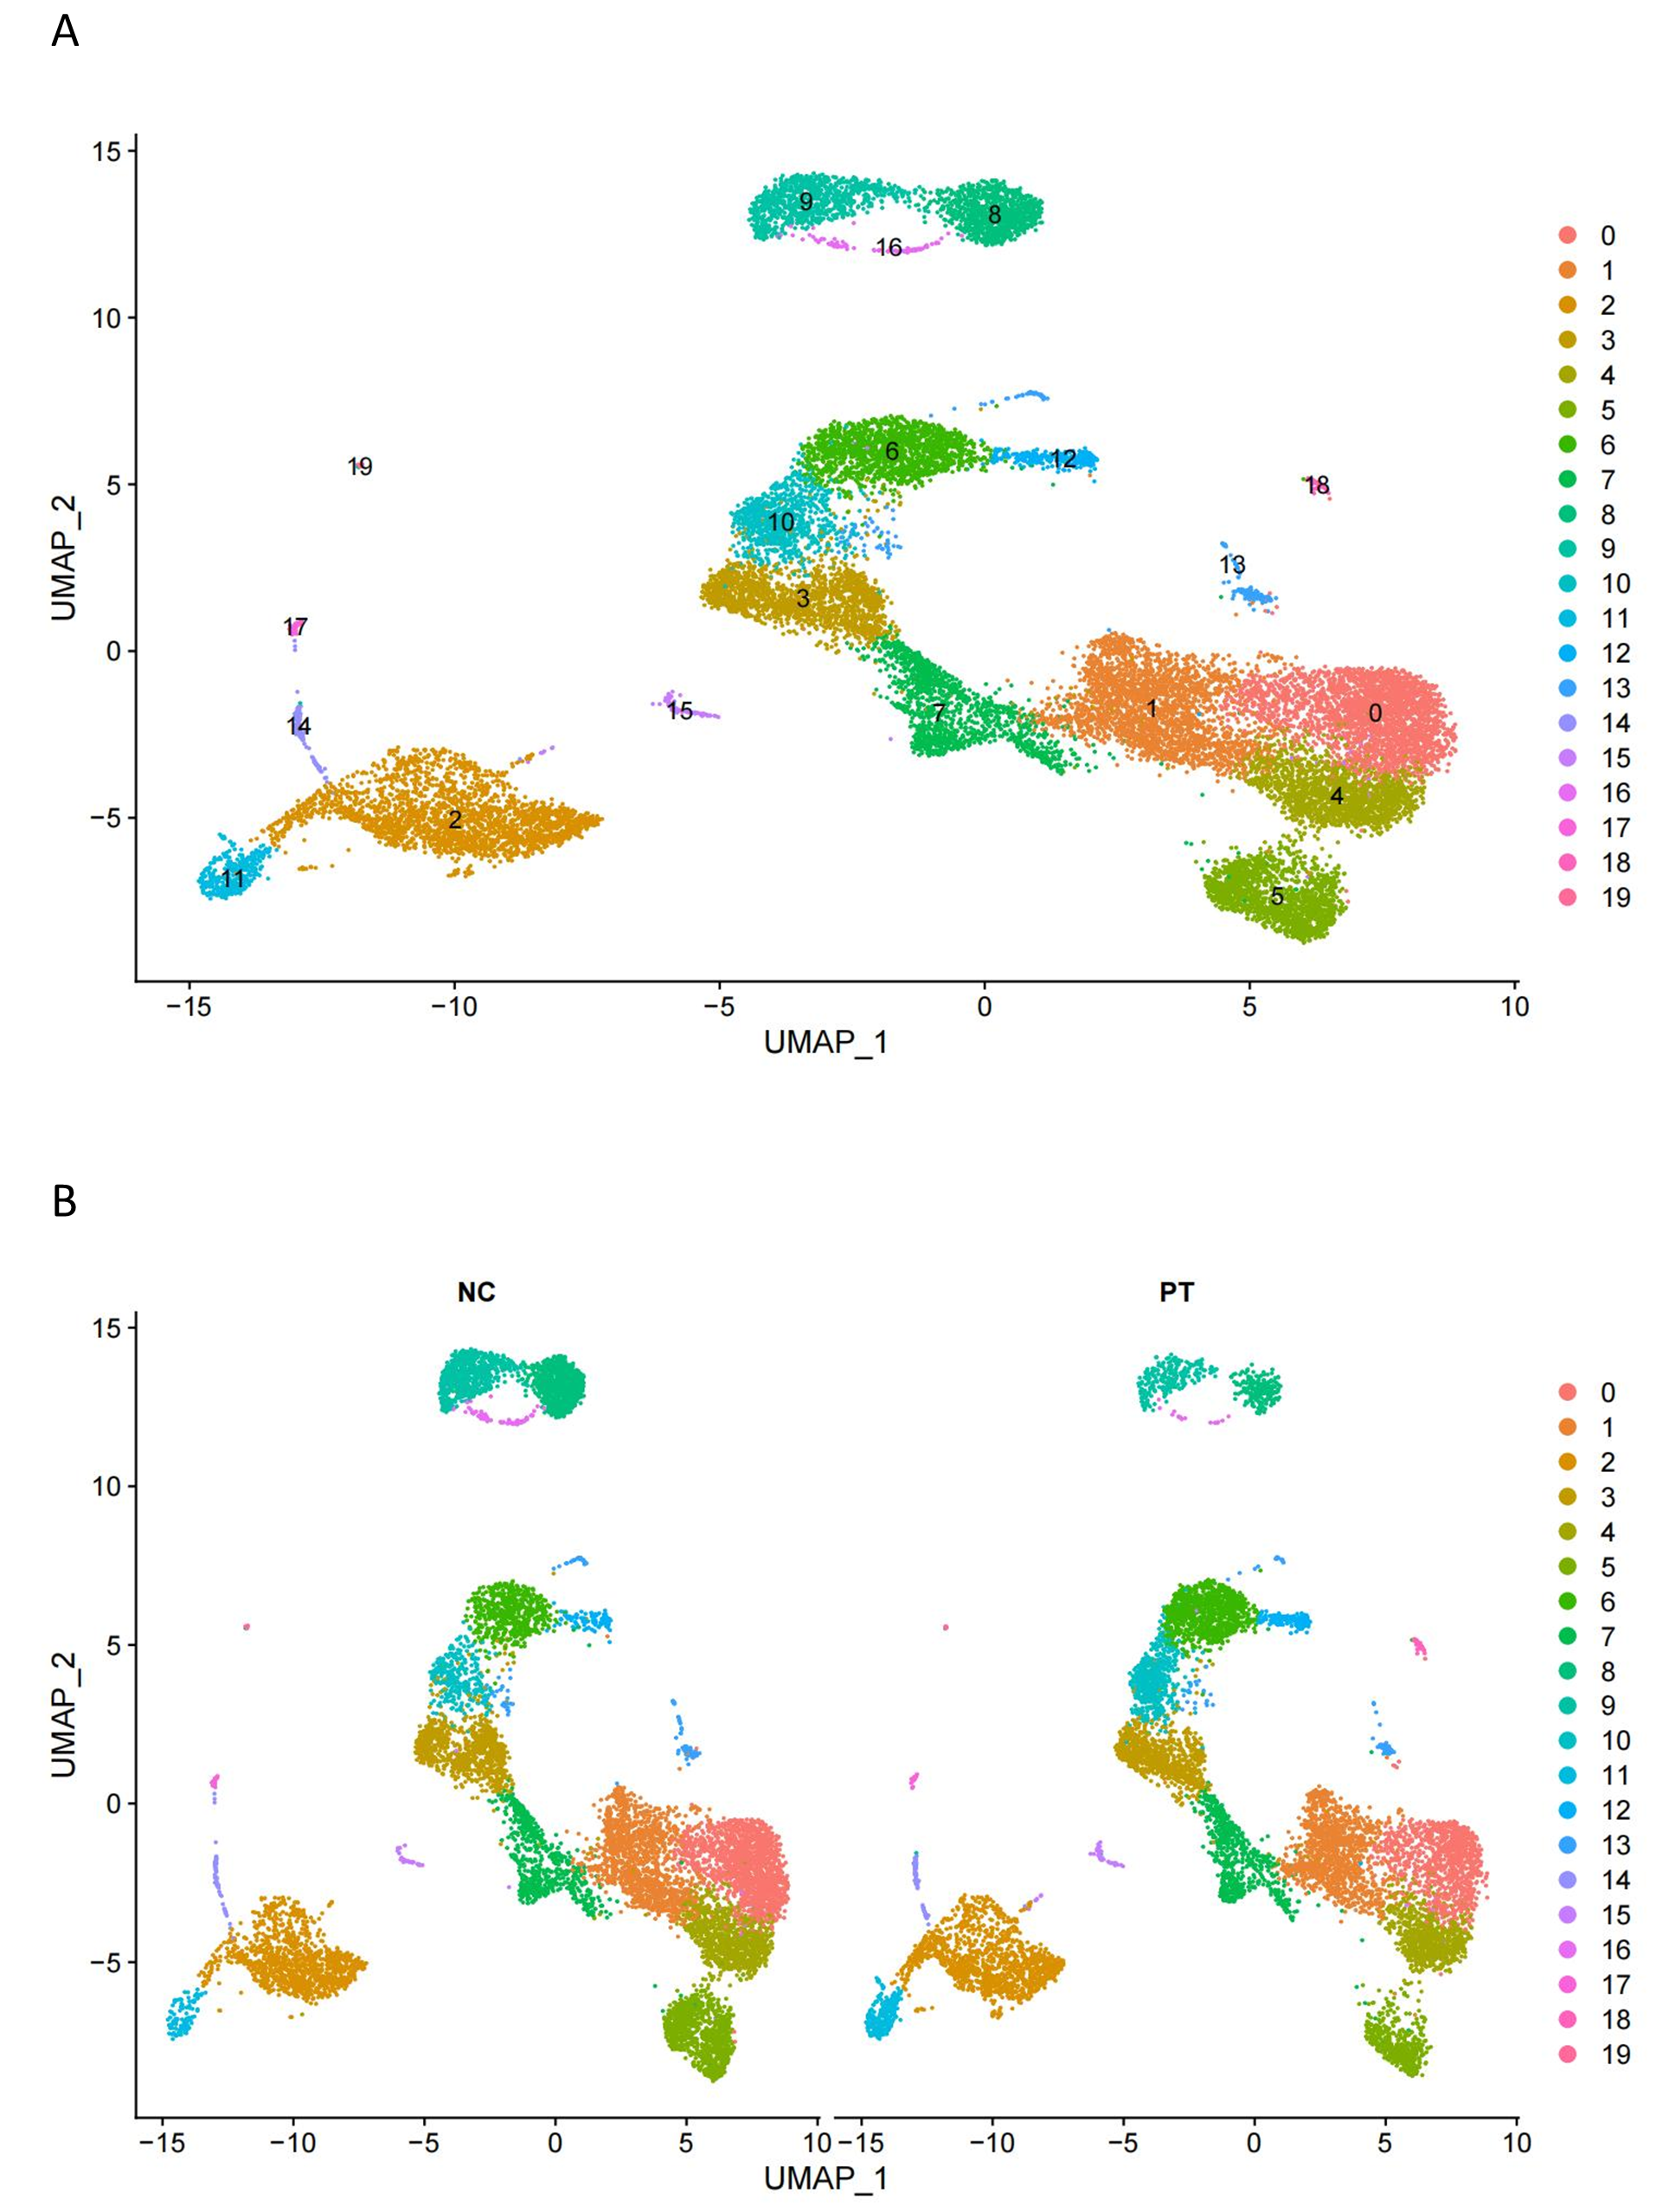


**Supplementary Figure 2.** A. The hierarchy of CD40 signaling pathway network visualized the interaction numbers (Left) and strength (Right) among T cell subsets. B. The heatmap of CD40 signaling pathway network based on the contributions to the cell-cell communication among T cell subsets. C. CD40 signaling pathway contribution to intercellular communication based on gene expression.


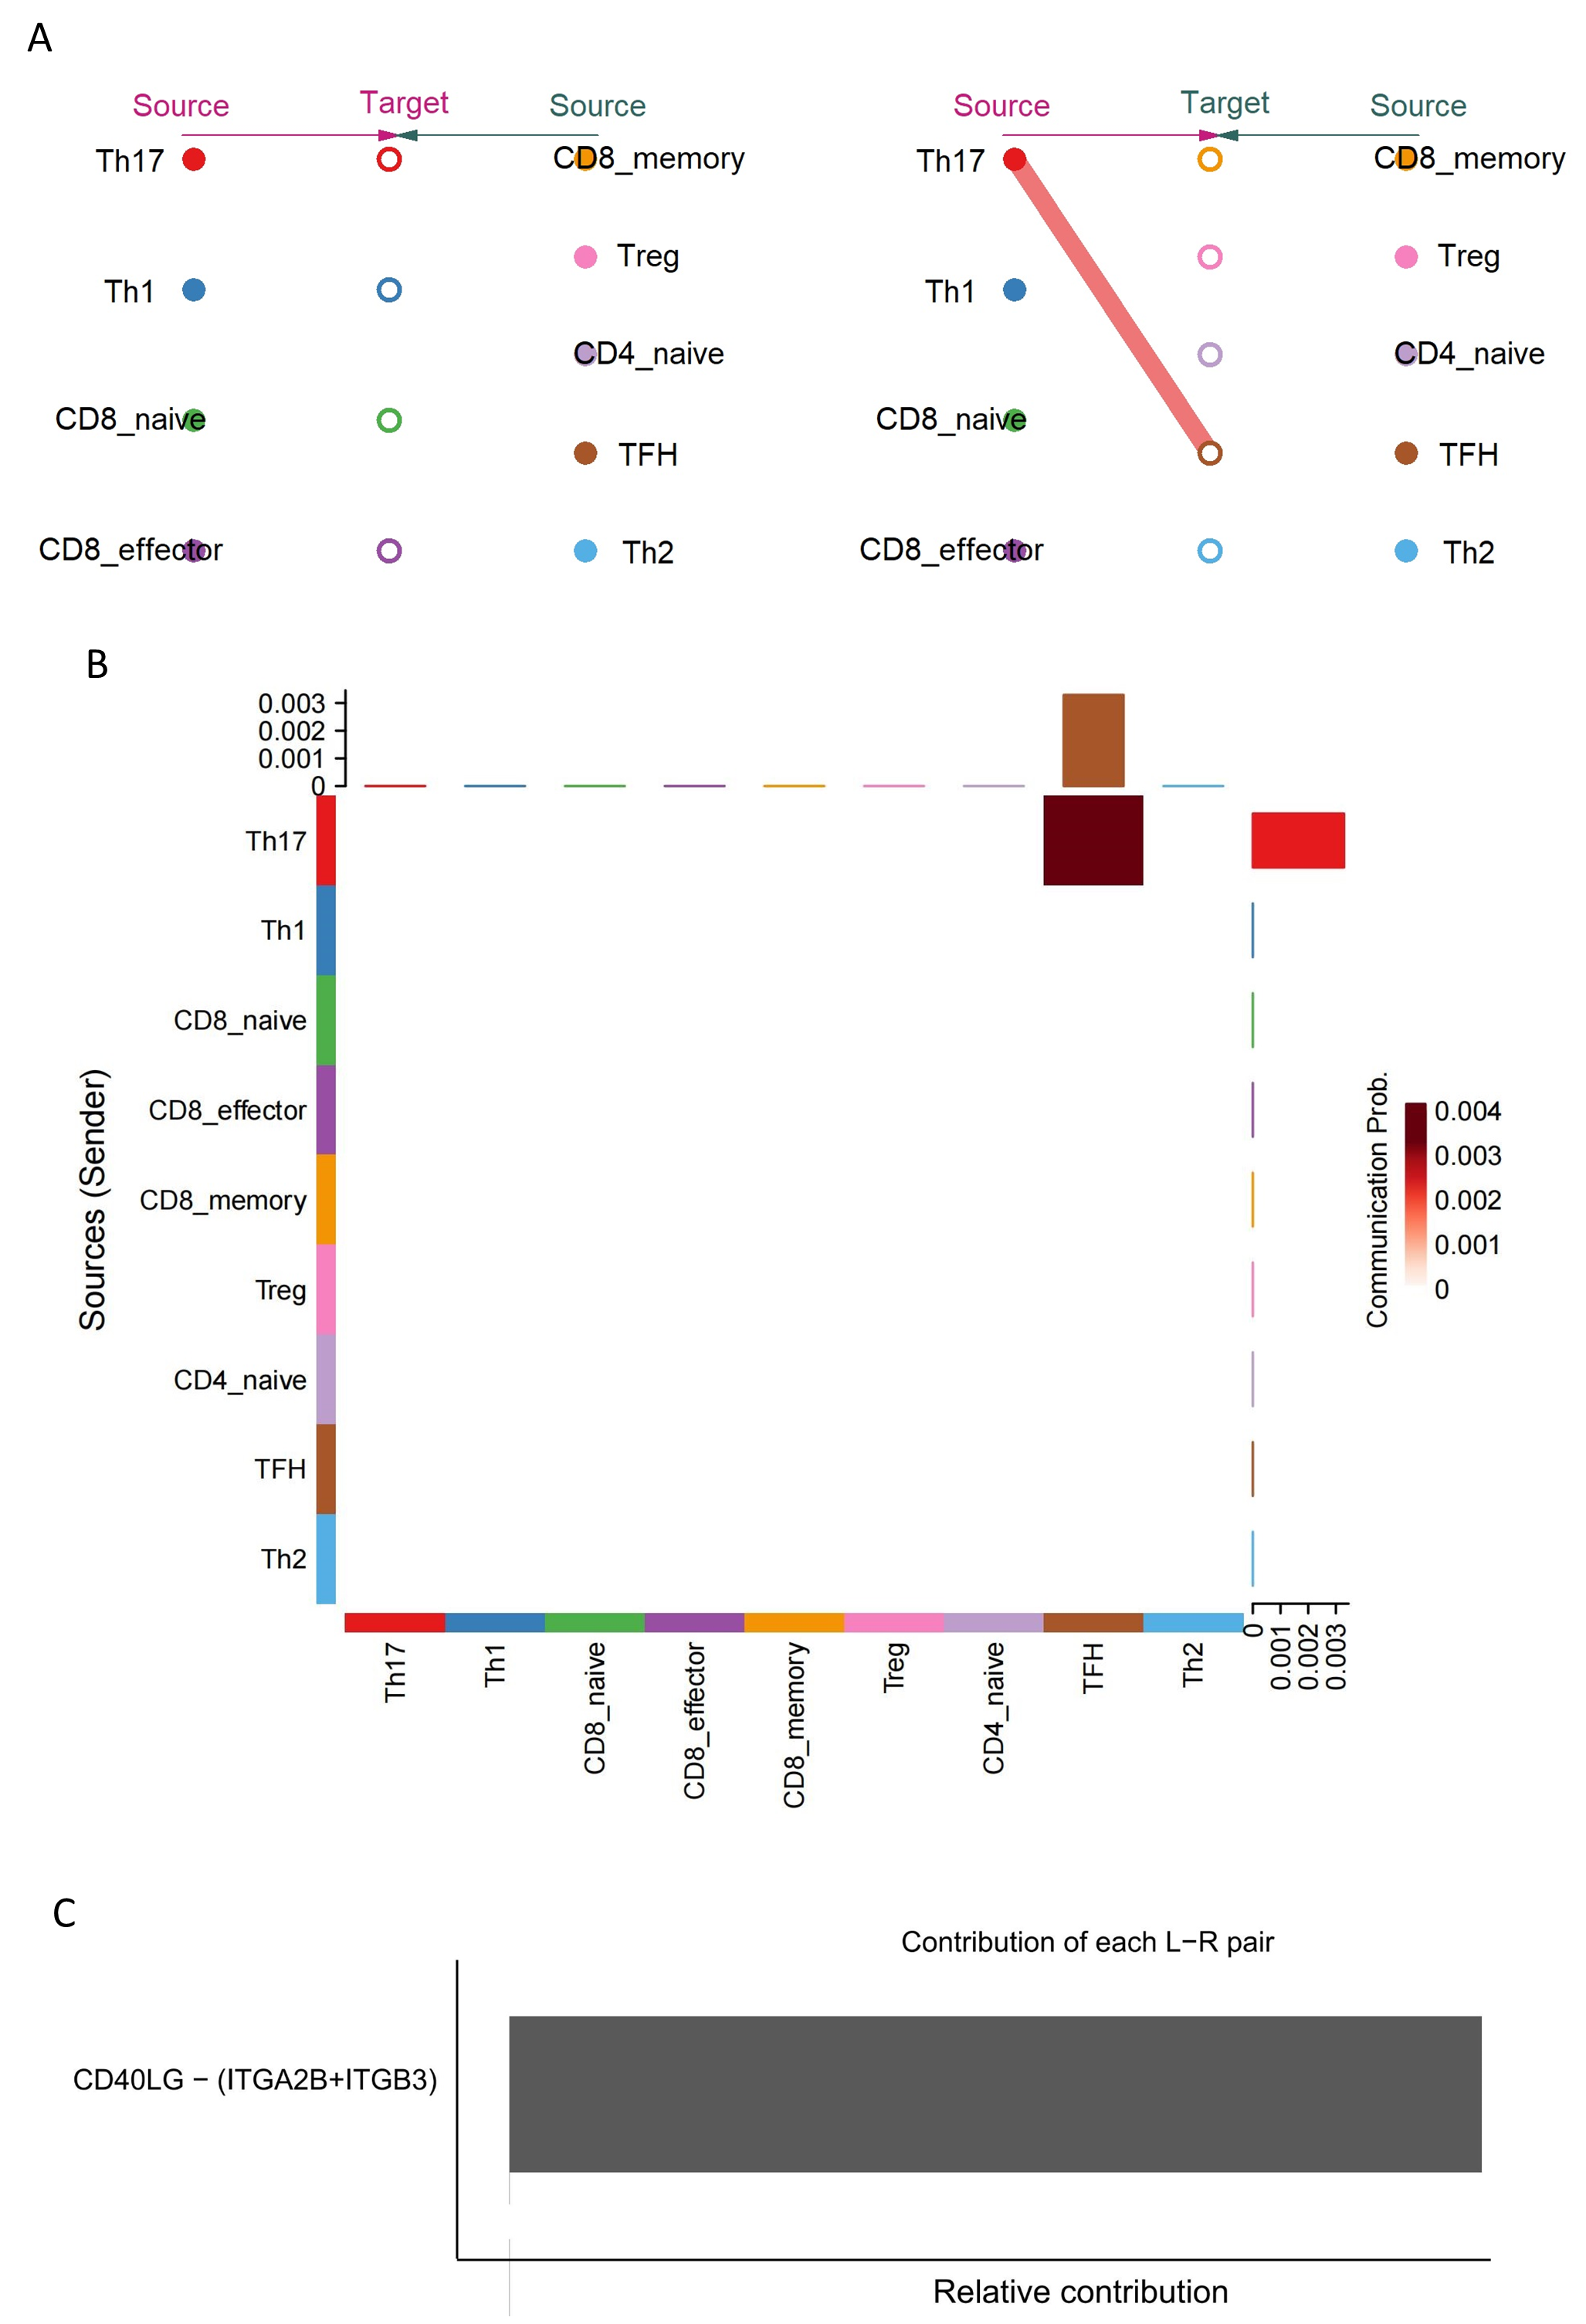


# Supplementary Table 1. Cell number of each immune cell types identified by scRNA from PBMCs.

| Group | T cells | Monocytes | NK cells | B cells | CMPs |
| --- | --- | --- | --- | --- | --- |
| NC | 6895 | 1255 | 1003 | 1497 | 13 |
| PT | 5116 | 1594 | 1769 | 461 | 9 |

# Supplementary Table 2. Cell number of each CD4+ Tcell subpopulation identified by scRNA from PBMCs.

| cluster | Cell Number |
| --- | --- |
| Th17 | 2532 |
| Th1 | 4026 |
| CD8_naive | 1682 |
| CD8_effector | 1985 |
| CD8_memory | 672 |
| Treg | 731 |
| CD4_naive | 201 |
| TFH | 136 |
